# Supplementary material
Source: PubMed Central journal article supplement (PMC2500228)
Supplement: M700478-MCP200_1.pdf [file M700478-MCP200_1.pdf]

**Table S1 Summary of the proteins quantitatively identified with 95% confidence in the iTRAQ study**

| Unused score | %Cov  | Peptide No. | Accession No | SWISS Prot ID | Protein name                                         | Fold (MKR/WT) | S.D. |
|--------------|-------|-------------|--------------|---------------|------------------------------------------------------|---------------|------|
| 2            | 14.42 | 2           | SC22B_MOUSE  | O08547        | Vesicle-trafficking protein SEC22b                   | 1.20          | 0.07 |
| 15.96        | 30.59 | 10          | DPYL2_MOUSE  | O08553        | Dihydropyrimidinase-related protein 2                | 0.73          | 0.17 |
| 10.37        | 43.75 | 7           | PRDX6_MOUSE  | O08709        | Peroxiredoxin-6                                      | 1.17          | 0.14 |
| 8            | 14.54 | 5           | DLDH_MOUSE   | O08749        | Dihydrolipoyl dehydrogenase, mitochondrial precursor | 0.81          | 0.03 |
| 10.11        | 11.52 | 9           | GLU2B_MOUSE  | O08795        | Glucosidase 2 subunit beta precursor                 | 1.80          | 0.25 |
| 3.22         | 7.18  | 5           | COPB2_MOUSE  | O55029        | Coatomer subunit beta'                               | 1.40          | 0.47 |
| 8.79         | 18.97 | 12          | AT2A2_MOUSE  | O55143        | Sarcoplasmic/endoplasmic reticulum calcium ATPase 2  | 0.63          | 0.26 |
| 5.62         | 41.33 | 5           | EF1B_MOUSE   | O70251        | Elongation factor 1-beta                             | 1.65          | 0.71 |
| 4            | 23.33 | 6           | DDC_MOUSE    | O88533        | Aromatic-L-amino-acid decarboxylase                  | 0.86          | 0.25 |
| 11.58        | 26.63 | 7           | ROA2_MOUSE   | O88569        | Heterogeneous nuclear ribonucleoproteins A2/B1       | 0.84          | 0.17 |
| 2.95         | 8.94  | 3           | IDHC_MOUSE   | O88844        | Isocitrate dehydrogenase [NADP] cytoplasmic          | 1.41          | 0.23 |
| 10           | 27.73 | 5           | ADH1_MOUSE   | P00329        | Alcohol dehydrogenase 1                              | 1.18          | 0.38 |
| 4            | 13.22 | 2           | COX2_MOUSE   | P00405        | Cytochrome c oxidase subunit 2                       | 0.66          | 0.15 |
| 2            | 5.87  | 2           | AMYS_MOUSE   | P00687        | Alpha-amylase 1 precursor                            | 1.35          | 0.29 |
| 6.25         | 18.31 | 7           | AMYP_MOUSE   | P00688        | Pancreatic alpha-amylase precursor                   | 1.21          | 0.41 |
| 8.51         | 70.37 | 5           | INS1_MOUSE   | P01325        | Insulin-1 precursor                                  | 0.50          | 0.13 |
| 12           | 75.45 | 5           | INS2_MOUSE   | P01326        | Insulin-2 precursor                                  | 0.74          | 0.29 |
| 6.84         | 62.68 | 6           | HBA_MOUSE    | P01942        | Hemoglobin subunit alpha                             | 0.91          | 0.29 |
| 9.65         | 88.44 | 11          | HBB1_MOUSE   | P02088        | Hemoglobin subunit beta-1                            | 0.89          | 0.22 |
| 16.67        | 76.19 | 10          | HBB2_MOUSE   | P02089        | Hemoglobin subunit beta-2                            | 0.98          | 0.25 |
| 6.47         | 17.91 | 5           | AATM_MOUSE   | P05202        | Aspartate aminotransferase, mitochondrial precursor  | 0.69          | 0.08 |
| 24.84        | 47.89 | 16          | TBA2_MOUSE   | P05213        | Tubulin alpha-2 chain                                | 1.11          | 0.13 |
| 8.05         | 13.44 | 6           | G6PI_MOUSE   | P06745        | Glucose-6-phosphate isomerase                        | 1.17          | 0.27 |
| 5.15         | 18.55 | 13          | HS90A_MOUSE  | P07901        | Heat shock protein HSP 90-alpha                      | 1.08          | 0.27 |
| 19.81        | 30.56 | 16          | PDIA4_MOUSE  | P08003        | Protein disulfide-isomerase A4 precursor             | 2.59          | 0.69 |
| 56.31        | 49.38 | 29          | ENPL_MOUSE   | P08113        | Endoplasmic precursor                                | 2.86          | 0.89 |
| 4            | 17.53 | 2           | SODC_MOUSE   | P08228        | Superoxide dismutase [Cu-Zn]                         | 0.88          | 0.49 |

**Table S1 Summary of the proteins quantitatively identified with 95% confidence in the iTRAQ study (continued)**

| Unused score | %Cov  | Peptide No. | Accession No | SWISS Prot ID | Protein name                                                      | Fold (MKR/WT) | S.D. |
|--------------|-------|-------------|--------------|---------------|-------------------------------------------------------------------|---------------|------|
| 21.64        | 49.41 | 12          | MDHM_MOUSE   | P08249        | Malate dehydrogenase, mitochondrial precursor                     | 0.89          | 0.27 |
| 54.48        | 71.12 | 34          | PDIA1_MOUSE  | P09103        | Protein disulfide-isomerase precursor                             | 2.43          | 0.51 |
| 2.6          | 6.79  | 5           | NUCL_MOUSE   | P09405        | Nucleolin                                                         | 0.96          | 0.34 |
| 7.68         | 27.34 | 10          | PGK1_MOUSE   | P09411        | Phosphoglycerate kinase 1                                         | 1.20          | 0.02 |
| 2.81         | 25.23 | 4           | SODM_MOUSE   | P09671        | Superoxide dismutase [Mn], mitochondrial precursor                | 0.75          | 0.13 |
| 23.08        | 48.92 | 13          | EF1A1_MOUSE  | P10126        | Elongation factor 1-alpha 1                                       | 1.77          | 0.43 |
| 2.67         | 42.86 | 5           | THIO_MOUSE   | P10639        | Thioredoxin                                                       | 1.53          | 0.28 |
| 2            | 11.03 | 4           | 4F2_MOUSE    | P10852        | 4F2 cell-surface antigen heavy chain (4F2hc)                      | 1.02          | 0.02 |
| 2.02         | 10.82 | 3           | H10_MOUSE    | P10922        | Histone H1.0                                                      | 1.06          | 0.88 |
| 15.9         | 26.8  | 18          | HS90B_MOUSE  | P11499        | Heat shock protein HSP 90-beta                                    | 0.94          | 0.07 |
| 4.55         | 13.06 | 6           | K2C8_MOUSE   | P11679        | Keratin, type II cytoskeletal 8                                   | 1.21          | 0.01 |
| 2.04         | 35.86 | 4           | COX5A_MOUSE  | P12787        | Cytochrome c oxidase subunit 5A, mitochondrial precursor          | 0.69          | 0.22 |
| 10.05        | 60.38 | 6           | 7B2_MOUSE    | P12961        | Neuroendocrine protein 7B2 precursor                              | 0.56          | 0.22 |
| 3.22         | 23.66 | 3           | IAPP_MOUSE   | P12968        | Islet amyloid polypeptide precursor                               | 0.79          | 0.30 |
| 2            | 8.65  | 2           | RL7A_MOUSE   | P12970        | 60S ribosomal protein L7a                                         | 1.51          | 0.13 |
| 14           | 30.84 | 8           | MDHC_MOUSE   | P14152        | Malate dehydrogenase, cytoplasmic                                 | 1.31          | 0.16 |
| 4.58         | 38.98 | 7           | RSSA_MOUSE   | P14206        | 40S ribosomal protein SA                                          | 1.27          | 0.09 |
| 27.6         | 59.62 | 18          | CALR_MOUSE   | P14211        | Calreticulin precursor                                            | 1.63          | 0.37 |
| 2            | 8.41  | 3           | GTR2_MOUSE   | P14246        | Solute carrier family 2, facilitated glucose transporter member 2 | 0.42          | 0.13 |
| 20.44        | 25.85 | 15          | ANXA6_MOUSE  | P14824        | Annexin A6                                                        | 1.24          | 0.17 |
| 6            | 40.06 | 10          | RLA0_MOUSE   | P14869        | 60S acidic ribosomal protein P0                                   | 1.01          | 0.20 |
| 5.7          | 58.55 | 9           | NDKA_MOUSE   | P15532        | Nucleoside diphosphate kinase A                                   | 1.13          | 0.20 |
| 3.1          | 13.76 | 4           | GSTM2_MOUSE  | P15626        | Glutathione S-transferase Mu 2                                    | 0.73          | 0.14 |
| 5.58         | 8.86  | 5           | SCG1_MOUSE   | P16014        | Secretogranin-1 precursor                                         | 0.56          | 0.19 |
| 12.79        | 11.37 | 17          | SPTA2_MOUSE  | P16546        | Spectrin alpha chain, brain                                       | 0.89          | 0.10 |
| 16.83        | 49.55 | 12          | G3P_MOUSE    | P16858        | Glyceraldehyde-3-phosphate dehydrogenase                          | 1.72          | 0.68 |
| 18.05        | 42.17 | 12          | ENOA_MOUSE   | P17182        | Alpha-enolase                                                     | 2.35          | 0.96 |
| 4            | 17.97 | 5           | ENOG_MOUSE   | P17183        | Gamma-enolase                                                     | 0.81          | 0.33 |

**Table S1 Summary of the proteins quantitatively identified with 95% confidence in the iTRAQ study (continued)**

| Unused score | %Cov  | Peptide No. | Accession No | SWISS Prot ID | Protein name                                                      | Fold (MKR/WT) | S.D. |
|--------------|-------|-------------|--------------|---------------|-------------------------------------------------------------------|---------------|------|
| 1.4          | 5.31  | 2           | PTBP1_MOUSE  | P17225        | Polypyrimidine tract-binding protein 1                            | 1.09          | 0.33 |
| 9.94         | 42.07 | 6           | PPIA_MOUSE   | P17742        | Peptidyl-prolyl cis-trans isomerase A                             | 0.71          | 0.08 |
| 9.85         | 37.75 | 7           | TPIS_MOUSE   | P17751        | Triosephosphate isomerase                                         | 0.98          | 0.14 |
| 4.06         | 12.68 | 3           | CATD_MOUSE   | P18242        | Cathepsin D precursor                                             | 1.29          | 0.25 |
| 5.7          | 30.12 | 5           | COF1_MOUSE   | P18760        | Cofilin-1 (Cofilin, non-muscle isoform)                           | 1.14          | 0.14 |
| 2.96         | 15.98 | 2           | COX41_MOUSE  | P19783        | Cytochrome c oxidase subunit 4 isoform 1, mitochondrial precursor | 0.70          | 0.27 |
| 72.06        | 60.76 | 38          | GRP78_MOUSE  | P20029        | 78 kDa glucose-regulated protein precursor                        | 2.25          | 0.72 |
| 3.91         | 25.7  | 6           | TPM3_MOUSE   | P21107        | Tropomyosin alpha-3 chain                                         | 1.13          | 0.53 |
| 4.4          | 44.29 | 4           | CYTC_MOUSE   | P21460        | Cystatin-C precursor                                              | 0.58          | 0.06 |
| 14.59        | 25.75 | 13          | NEC2_MOUSE   | P21661        | Neuroendocrine convertase 2 precursor                             | 0.54          | 0.14 |
| 5.05         | 28.37 | 4           | PPIB_MOUSE   | P24369        | Peptidyl-prolyl cis-trans isomerase B precursor                   | 1.61          | 0.27 |
| 3.72         | 19.11 | 5           | RS2_MOUSE    | P25444        | 40S ribosomal protein S2                                          | 1.38          | 0.10 |
| 16.83        | 31.32 | 10          | CMGA_MOUSE   | P26339        | Chromogranin A precursor                                          | 0.31          | 0.16 |
| 6.96         | 10.22 | 4           | DHE3_MOUSE   | P26443        | Glutamate dehydrogenase 1, mitochondrial precursor                | 0.58          | 0.17 |
| 6            | 20.25 | 3           | PSD7_MOUSE   | P26516        | 26S proteasome non-ATPase regulatory subunit 7                    | 1.47          | 0.25 |
| 56.54        | 57.54 | 26          | PDIA3_MOUSE  | P27773        | Protein disulfide-isomerase A3 precursor                          | 1.62          | 0.35 |
| 5.1          | 75.86 | 5           | ACBP_MOUSE   | P31786        | Acyl-CoA-binding protein (ACBP)                                   | 0.89          | 0.06 |
| 2            | 8.19  | 3           | LA_MOUSE     | P32067        | Lupus La protein homolog                                          | 0.86          | 0.35 |
| 1.51         | 5.41  | 2           | SYWC_MOUSE   | P32921        | Tryptophanyl-tRNA synthetase, cytoplasmic                         | 0.84          | 0.03 |
| 2            | 9.59  | 2           | RAB3D_MOUSE  | P35276        | Ras-related protein Rab-3D                                        | 0.77          | 0.05 |
| 15.39        | 26.73 | 13          | CALX_MOUSE   | P35564        | Calnexin precursor                                                | 1.17          | 0.37 |
| 12.1         | 43.72 | 6           | PRDX1_MOUSE  | P35700        | Peroxiredoxin-1                                                   | 1.34          | 0.28 |
| 4            | 27.88 | 4           | RL12_MOUSE   | P35979        | 60S ribosomal protein L12                                         | 1.12          | 0.07 |
| 14.55        | 18.26 | 10          | GRP75_MOUSE  | P38647        | Stress-70 protein, mitochondrial precursor                        | 1.00          | 0.13 |
| 5.52         | 14.56 | 4           | CAP1_MOUSE   | P40124        | Adenylyl cyclase-associated protein 1                             | 0.89          | 0.02 |
| 7.52         | 16.05 | 6           | TKT_MOUSE    | P40142        | Transketolase                                                     | 0.89          | 0.09 |
| 2.08         | 8.54  | 3           | ALDR_MOUSE   | P45376        | Aldose reductase                                                  | 0.86          | 0.07 |
| 12           | 55.71 | 6           | FKBP2_MOUSE  | P45878        | FK506-binding protein 2 precursor                                 | 1.69          | 0.51 |

**Table S1 Summary of the proteins quantitatively identified with 95% confidence in the iTRAQ study (continued)**

| Unused score | %Cov  | Peptide No. | Accession No | SWISS Prot ID | Protein name                                                  | Fold (MKR/WT) | S.D. |
|--------------|-------|-------------|--------------|---------------|---------------------------------------------------------------|---------------|------|
| 6            | 26.19 | 3           | GSTP2_MOUSE  | P46425        | Glutathione S-transferase P 2                                 | 0.90          | 0.07 |
| 14.07        | 37.79 | 13          | SCG3_MOUSE   | P47867        | Secretogranin-3 precursor                                     | 0.37          | 0.14 |
| 4            | 51.75 | 2           | RLA1_MOUSE   | P47955        | 60S acidic ribosomal protein P1                               | 1.34          | 0.16 |
| 2.15         | 34.51 | 2           | EIF1_MOUSE   | P48024        | Eukaryotic translation initiation factor 1 (eIF1)             | 1.66          | 0.22 |
| 23.51        | 42.32 | 14          | ANXA5_MOUSE  | P48036        | Annexin A5                                                    | 0.70          | 0.15 |
| 12.15        | 15.94 | 11          | LMNA_MOUSE   | P48678        | Lamin-A/C                                                     | 0.92          | 0.21 |
| 4.01         | 15.77 | 4           | ADT1_MOUSE   | P48962        | ADP/ATP translocase 1                                         | 0.63          | 0.12 |
| 6            | 25.94 | 7           | ROA1_MOUSE   | P49312        | Heterogeneous nuclear ribonucleoprotein A1                    | 1.06          | 0.09 |
| 6.01         | 41.88 | 6           | PSA2_MOUSE   | P49722        | Proteasome subunit alpha type 2                               | 1.46          | 0.04 |
| 2            | 11.67 | 2           | IMDH1_MOUSE  | P50096        | Inosine-5'-monophosphate dehydrogenase 1                      | 2.75          | 0.32 |
| 4            | 14.54 | 3           | GDIA_MOUSE   | P50396        | Rab GDP dissociation inhibitor alpha                          | 1.48          | 0.10 |
| 8.11         | 23.01 | 10          | VATA1_MOUSE  | P50516        | Vacuolar ATP synthase catalytic subunit A, ubiquitous isoform | 0.79          | 0.18 |
| 4.02         | 22.81 | 4           | VATE_MOUSE   | P50518        | Vacuolar ATP synthase subunit E                               | 0.89          | 0.05 |
| 4            | 27.55 | 2           | S10AB_MOUSE  | P50543        | Protein S100-A11                                              | 1.12          | 0.21 |
| 6.02         | 16.44 | 5           | ADT2_MOUSE   | P51881        | ADP/ATP translocase 2                                         | 0.75          | 0.14 |
| 26.04        | 45.39 | 16          | KPYM_MOUSE   | P52480        | Pyruvate kinase isozyme M2                                    | 1.24          | 0.25 |
| 7.4          | 22.58 | 4           | RL10A_MOUSE  | P53026        | 60S ribosomal protein L10a                                    | 1.34          | 0.29 |
| 2.42         | 34.43 | 5           | RAB2A_MOUSE  | P53994        | Ras-related protein Rab-2A                                    | 0.91          | 0.03 |
| 10.72        | 25.19 | 11          | IDHP_MOUSE   | P54071        | Isocitrate dehydrogenase [NADP], mitochondrial precursor      | 0.64          | 0.10 |
| 4            | 9.81  | 4           | PRS6B_MOUSE  | P54775        | 26S protease regulatory subunit 6B                            | 1.40          | 0.27 |
| 14.96        | 66.67 | 10          | GLUC_MOUSE   | P55095        | Glucagon precursor                                            | 0.23          | 0.10 |
| 2            | 46.59 | 2           | ATPK_MOUSE   | P56135        | ATP synthase f chain, mitochondrial                           | 0.75          | 0.09 |
| 31.34        | 60.49 | 23          | ATPB_MOUSE   | P56480        | ATP synthase subunit beta, mitochondrial precursor            | 0.82          | 0.07 |
| 6.08         | 19.85 | 4           | ERP29_MOUSE  | P57759        | Endoplasmic reticulum protein ERp29 precursor                 | 2.40          | 0.41 |
| 6            | 28.47 | 5           | EF1D_MOUSE   | P57776        | Elongation factor 1-delta                                     | 1.15          | 0.06 |
| 17.06        | 28.73 | 18          | ACTN4_MOUSE  | P57780        | Alpha-actinin-4 (Non-muscle alpha-actinin 4)                  | 1.05          | 0.36 |
| 34.09        | 33.45 | 22          | EF2_MOUSE    | P58252        | Elongation factor 2 (EF-2)                                    | 1.12          | 0.13 |
| 2            | 6.76  | 2           | IF5_MOUSE    | P59325        | Eukaryotic translation initiation factor 5                    | 1.45          | 0.22 |

**Table S1 Summary of the proteins quantitatively identified with 95% confidence in the iTRAQ study (continued)**

| Unused score | %Cov  | Peptide No. | Accession No | SWISS Prot ID | Protein name                                       | Fold (MKR/WT) | S.D. |
|--------------|-------|-------------|--------------|---------------|----------------------------------------------------|---------------|------|
| 2            | 15.52 | 3           | SMS_MOUSE    | P60041        | Somatostatin precursor                             | 0.29          | 0.04 |
| 21.75        | 53.6  | 14          | ACTB_MOUSE   | P60710        | Actin, cytoplasmic 1                               | 1.02          | 0.22 |
| 2.32         | 16.75 | 3           | CDC42_MOUSE  | P60766        | Cell division control protein 42 homolog precursor | 0.99          | 0.16 |
| 5.53         | 24.38 | 7           | IF4A1_MOUSE  | P60843        | Eukaryotic initiation factor 4A-I                  | 1.08          | 0.18 |
| 2.11         | 13    | 2           | RAB10_MOUSE  | P61027        | Ras-related protein Rab-10                         | 0.83          | 0.07 |
| 5.05         | 58.82 | 3           | UFM1_MOUSE   | P61961        | Ubiquitin-fold modifier 1 precursor                | 1.94          | 0.51 |
| 11.23        | 23.54 | 8           | HNRPK_MOUSE  | P61979        | Heterogeneous nuclear ribonucleoprotein K          | 0.74          | 0.15 |
| 3.52         | 25.91 | 6           | 1433G_MOUSE  | P61982        | 14-3-3 protein gamma                               | 1.15          | 0.17 |
| 2.25         | 22.27 | 6           | PRS4_MOUSE   | P62192        | 26S protease regulatory subunit 4                  | 1.03          | 0.05 |
| 6            | 36.91 | 3           | CALM_MOUSE   | P62204        | Calmodulin (CaM)                                   | 1.04          | 0.17 |
| 2.41         | 19.23 | 5           | RS8_MOUSE    | P62242        | 40S ribosomal protein S8                           | 0.91          | 0.16 |
| 2            | 15.38 | 2           | RS15A_MOUSE  | P62245        | 40S ribosomal protein S15a                         | 1.61          | 0.29 |
| 3.7          | 32.94 | 7           | 1433E_MOUSE  | P62259        | 14-3-3 protein epsilon                             | 1.01          | 0.26 |
| 2.15         | 15.13 | 3           | RS18_MOUSE   | P62270        | 40S ribosomal protein S18                          | 1.56          | 0.09 |
| 2.12         | 18.54 | 3           | RS13_MOUSE   | P62301        | 40S ribosomal protein S13                          | 1.30          | 0.14 |
| 12.68        | 43.69 | 6           | H4_MOUSE     | P62806        | Histone H4                                         | 0.52          | 0.19 |
| 2            | 7.24  | 2           | VATB2_MOUSE  | P62814        | Vacuolar ATP synthase subunit B, brain isoform     | 0.54          | 0.05 |
| 4.31         | 20.49 | 3           | RAB1A_MOUSE  | P62821        | Ras-related protein Rab-1A                         | 1.48          | 0.11 |
| 2            | 13.59 | 2           | RAP1A_MOUSE  | P62835        | Ras-related protein Rap-1A precursor               | 0.93          | 0.12 |
| 4.44         | 28.8  | 5           | RS25_MOUSE   | P62852        | 40S ribosomal protein S25                          | 1.53          | 0.19 |
| 9.67         | 57.14 | 5           | CYC_MOUSE    | P62897        | Cytochrome c, somatic                              | 1.35          | 0.03 |
| 3.69         | 15.64 | 3           | RS3_MOUSE    | P62908        | 40S ribosomal protein S3                           | 1.59          | 0.95 |
| 4            | 46.43 | 4           | PROF1_MOUSE  | P62962        | Profilin-1 (Profilin I)                            | 1.06          | 0.15 |
| 4.55         | 60.53 | 5           | UBIQ_MOUSE   | P62991        | Ubiquitin                                          | 1.08          | 0.22 |
| 3            | 10.91 | 2           | RAB3A_MOUSE  | P63011        | Ras-related protein Rab-3A                         | 0.69          | 0.04 |
| 35           | 42.72 | 24          | HSP7C_MOUSE  | P63017        | Heat shock cognate 71 kDa protein                  | 0.96          | 0.13 |
| 4            | 15.7  | 2           | TCTP_MOUSE   | P63028        | Translationally-controlled tumor protein           | 1.36          | 0.12 |
| 30.23        | 52.01 | 19          | CH60_MOUSE   | P63038        | 60 kDa heat shock protein, mitochondrial precursor | 0.90          | 0.14 |
| 8            | 35.34 | 4           | VAMP2_MOUSE  | P63044        | Vesicle-associated membrane protein 2              | 0.59          | 0.05 |

**Table S1 Summary of the proteins quantitatively identified with 95% confidence in the iTRAQ study (continued)**

| Unused score | %Cov  | Peptide No. | Accession No | SWISS Prot ID | Protein name                                                                     | Fold (MKR/WT) | S.D. |
|--------------|-------|-------------|--------------|---------------|----------------------------------------------------------------------------------|---------------|------|
| 9.29         | 35.51 | 7           | 1433Z_MOUSE  | P63101        | 14-3-3 protein zeta/delta                                                        | 0.91          | 0.22 |
| 6.75         | 38.6  | 7           | HMGB1_MOUSE  | P63158        | High mobility group protein B1                                                   | 0.71          | 0.25 |
| 2.49         | 6.51  | 4           | NEC1_MOUSE   | P63239        | Neuroendocrine convertase 1 precursor                                            | 0.65          | 0.20 |
| 6.06         | 35.71 | 4           | IF5A1_MOUSE  | P63242        | Eukaryotic translation initiation factor 5A-1                                    | 1.51          | 0.20 |
| 7.52         | 48.89 | 4           | RS17_MOUSE   | P63276        | 40S ribosomal protein S17                                                        | 1.10          | 0.10 |
| 3.77         | 21.97 | 4           | RS12_MOUSE   | P63323        | 40S ribosomal protein S12                                                        | 0.98          | 0.68 |
| 2.42         | 20    | 3           | RS10_MOUSE   | P63325        | 40S ribosomal protein S10                                                        | 1.39          | 0.16 |
| 2.3          | 11.76 | 2           | PHB_MOUSE    | P67778        | Prohibitin                                                                       | 0.54          | 0.08 |
| 3            | 42.18 | 12          | ACTC_MOUSE   | P68033        | Actin, alpha cardiac muscle 1                                                    | 0.93          | 0.13 |
| 5.1          | 39.18 | 9           | 1433T_MOUSE  | P68254        | 14-3-3 protein theta                                                             | 0.99          | 0.11 |
| 33.52        | 64.04 | 19          | TBB2C_MOUSE  | P68372        | Tubulin beta-2C chain                                                            | 1.29          | 0.39 |
| 2            | 20.33 | 5           | 1433F_MOUSE  | P68510        | 14-3-3 protein eta                                                               | 0.87          | 0.08 |
| 1.53         | 10.05 | 6           | IMB1_MOUSE   | P70168        | Importin beta-1 subunit                                                          | 0.76          | 0.09 |
| 13.97        | 69.52 | 8           | PEBP1_MOUSE  | P70296        | Phosphatidylethanolamine-binding protein 1                                       | 1.04          | 0.10 |
| 4.47         | 41.27 | 3           | HINT1_MOUSE  | P70349        | Histidine triad nucleotide-binding protein 1                                     | 0.99          | 0.20 |
| 4            | 6.72  | 8           | NACAM_MOUSE  | P70670        | Nascent polypeptide-associated complex subunit alpha, muscle-specific form       | 1.69          | 0.24 |
| 3.7          | 8.5   | 4           | LYAG_MOUSE   | P70699        | Lysosomal alpha-glucosidase precursor                                            | 1.97          | 0.33 |
| 3.72         | 6.1   | 3           | TCPE_MOUSE   | P80316        | T-complex protein 1 subunit epsilon                                              | 1.15          | 0.04 |
| 2            | 13.94 | 6           | TCPZ_MOUSE   | P80317        | T-complex protein 1 subunit zeta                                                 | 1.11          | 0.49 |
| 20.61        | 41.19 | 14          | NUCB2_MOUSE  | P81117        | Nucleobindin-2 precursor                                                         | 2.25          | 0.41 |
| 4.61         | 28.73 | 4           | ARF1_MOUSE   | P84078        | ADP-ribosylation factor 1                                                        | 1.09          | 0.14 |
| 2.05         | 29.85 | 4           | CPLX2_MOUSE  | P84086        | Complexin-2                                                                      | 0.67          | 0.03 |
| 3.8          | 16.29 | 4           | RS3A_MOUSE   | P97351        | 40S ribosomal protein S3a                                                        | 1.23          | 0.15 |
| 2            | 3.88  | 3           | AMD_MOUSE    | P97467        | Peptidyl-glycine alpha-amidating monooxygenase precursor (PAM)                   | 1.00          | 0.11 |
| 9.64         | 21.3  | 7           | FUMH_MOUSE   | P97807        | Fumarate hydratase, mitochondrial precursor                                      | 1.46          | 0.39 |
| 2.84         | 60.14 | 17          | TBB5_MOUSE   | P99024        | Tubulin beta-5 chain                                                             | 1.57          | 0.43 |
| 8.05         | 72.17 | 6           | RLA2_MOUSE   | P99027        | 60S acidic ribosomal protein P2                                                  | 1.22          | 0.15 |
| 2            | 49.44 | 2           | UCRH_MOUSE   | P99028        | Ubiquinol-cytochrome c reductase complex 11 kDa protein, mitochondrial precursor | 0.66          | 0.12 |

**Table S1 Summary of the proteins quantitatively identified with 95% confidence in the iTRAQ study (continued)**

| Unused score | %Cov  | Peptide No. | Accession No | SWISS Prot ID | Protein name                                                       | Fold (MKR/WT) | S.D. |
|--------------|-------|-------------|--------------|---------------|--------------------------------------------------------------------|---------------|------|
| 6.34         | 24.29 | 5           | PRDX5_MOUSE  | P99029        | Peroxiredoxin-5, mitochondrial precursor                           | 0.99          | 0.04 |
| 19.07        | 44.54 | 15          | CBPE_MOUSE   | Q00493        | Carboxypeptidase E precursor                                       | 0.59          | 0.08 |
| 16.02        | 70.39 | 9           | NDKB_MOUSE   | Q01768        | Nucleoside diphosphate kinase B                                    | 1.33          | 0.38 |
| 38.97        | 47.52 | 26          | TERA_MOUSE   | Q01853        | Transitional endoplasmic reticulum ATPase                          | 1.50          | 0.17 |
| 15.94        | 17.96 | 11          | UBE1X_MOUSE  | Q02053        | Ubiquitin-activating enzyme E1 X                                   | 0.97          | 0.09 |
| 6            | 20.48 | 7           | NUCB1_MOUSE  | Q02819        | Nucleobindin-1 precursor                                           | 0.71          | 0.13 |
| 23.8         | 39.06 | 18          | ATPA_MOUSE   | Q03265        | ATP synthase subunit alpha, mitochondrial precursor                | 1.24          | 0.58 |
| 27.3         | 54.13 | 25          | SCG2_MOUSE   | Q03517        | Secretogranin-2 precursor                                          | 0.70          | 0.21 |
| 16.96        | 61.94 | 13          | KCRB_MOUSE   | Q04447        | Creatine kinase B-type                                             | 0.55          | 0.18 |
| 8.68         | 10.7  | 8           | PYC_MOUSE    | Q05920        | Pyruvate carboxylase, mitochondrial precursor                      | 0.43          | 0.15 |
| 2            | 16.02 | 2           | HAP28_MOUSE  | Q3UHX2        | 28 kDa heat- and acid-stable phosphoprotein                        | 1.31          | 0.15 |
| 10.96        | 27.98 | 10          | COPD_MOUSE   | Q5XJY5        | Coatmer subunit delta                                              | 1.26          | 0.07 |
| 6.25         | 14.13 | 9           | ODO1_MOUSE   | Q60597        | 2-oxoglutarate dehydrogenase E1 component, mitochondrial precursor | 0.73          | 0.08 |
| 3.7          | 17.88 | 2           | MYL6_MOUSE   | Q60605        | Myosin light polypeptide 6                                         | 1.03          | 0.21 |
| 7.85         | 17.75 | 5           | HNRPD_MOUSE  | Q60668        | Heterogeneous nuclear ribonucleoprotein D0                         | 0.74          | 0.10 |
| 4.26         | 29.8  | 3           | PRDX2_MOUSE  | Q61171        | Peroxiredoxin-2                                                    | 0.99          | 0.27 |
| 4            | 14.41 | 3           | PA1B2_MOUSE  | Q61206        | Platelet-activating factor acetylhydrolase IB subunit beta         | 0.98          | 0.08 |
| 6            | 7.18  | 3           | SAP_MOUSE    | Q61207        | Sulfated glycoprotein 1 precursor                                  | 0.85          | 0.44 |
| 16.2         | 43.63 | 10          | HCDH_MOUSE   | Q61425        | Hydroxyacyl-coenzyme A dehydrogenase, mitochondrial precursor      | 0.63          | 0.09 |
| 2.09         | 6.47  | 7           | GSLG1_MOUSE  | Q61543        | Golgi apparatus protein 1 precursor                                | 1.30          | 0.04 |
| 7.67         | 20.22 | 6           | GDIB_MOUSE   | Q61598        | Rab GDP dissociation inhibitor beta                                | 1.02          | 0.23 |
| 4.32         | 30.14 | 5           | NPM_MOUSE    | Q61937        | Nucleophosmin                                                      | 1.07          | 0.34 |
| 2.08         | 5.8   | 9           | SPTB2_MOUSE  | Q62261        | Spectrin beta chain, brain 1                                       | 0.89          | 0.02 |
| 6.33         | 34.59 | 5           | TPD52_MOUSE  | Q62393        | Tumor protein D52 (mD52)                                           | 1.41          | 0.47 |
| 4.59         | 14.78 | 4           | VAT1_MOUSE   | Q62465        | Synaptic vesicle membrane protein VAT-1 homolog                    | 0.72          | 0.03 |
| 4            | 8.55  | 2           | SURF4_MOUSE  | Q64310        | Surfeit locus protein 4                                            | 1.00          | 0.11 |

**Table S1 Summary of the proteins quantitatively identified with 95% confidence in the iTRAQ study (continued)**

| Unused score | %Cov  | Peptide No. | Accession No | SWISS Prot ID | Protein name                                                                       | Fold (MKR/WT) | S.D. |
|--------------|-------|-------------|--------------|---------------|------------------------------------------------------------------------------------|---------------|------|
| 2            | 8.93  | 8           | MYO6_MOUSE   | Q64331        | Myosin-6                                                                           | 0.52          | 0.05 |
| 2.91         | 33.33 | 4           | CH10_MOUSE   | Q64433        | 10 kDa heat shock protein, mitochondrial                                           | 0.79          | 0.25 |
| 4.51         | 15.61 | 12          | AT2A3_MOUSE  | Q64518        | Sarcoplasmic/endoplasmic reticulum calcium ATPase 3                                | 0.79          | 0.06 |
| 4            | 5.09  | 3           | GPDM_MOUSE   | Q64521        | Glycerol-3-phosphate dehydrogenase, mitochondrial precursor                        | 0.70          | 0.05 |
| 2.19         | 12.1  | 7           | VINC_MOUSE   | Q64727        | Vinculin                                                                           | 1.53          | 0.19 |
| 4            | 19.01 | 3           | IF31_MOUSE   | Q66JS6        | Eukaryotic translation initiation factor 3 subunit 1                               | 2.12          | 0.40 |
| 22.26        | 17.73 | 20          | CLH_MOUSE    | Q68FD5        | Clathrin heavy chain                                                               | 1.48          | 0.71 |
| 4            | 7.25  | 2           | PEPL1_MOUSE  | Q6NSR8        | Probable aminopeptidase NPEPL1                                                     | 1.44          | 0.23 |
| 9.43         | 17.62 | 13          | UGGG1_MOUSE  | Q6P5E4        | UDP-glucose:glycoprotein glucosyltransferase 1 precursor                           | 1.39          | 0.22 |
| 4            | 5.28  | 4           | CAND1_MOUSE  | Q6ZQ38        | Cullin-associated NEDD8-dissociated protein 1                                      | 0.80          | 0.21 |
| 5.05         | 8.49  | 4           | 2AAA_MOUSE   | Q76MZ3        | Serine/threonine-protein phosphatase 2A 65 kDa regulatory subunit A alpha isoform  | 0.98          | 0.09 |
| 6.32         | 66.74 | 19          | TBB2A_MOUSE  | Q7TMM9        | Tubulin beta-2A chain                                                              | 0.72          | 0.07 |
| 4.01         | 18.5  | 14          | ACTN1_MOUSE  | Q7TPR4        | Alpha-actinin-1                                                                    | 0.92          | 0.17 |
| 2            | 16.24 | 4           | OTUB1_MOUSE  | Q7TQI3        | Ubiquitin thioesterase protein OTUB1                                               | 0.68          | 0.05 |
| 11.53        | 10.88 | 17          | FLNB_MOUSE   | Q80X90        | Filamin-B                                                                          | 1.18          | 0.21 |
| 16.3         | 30.08 | 11          | ROA3_MOUSE   | Q8BG05        | Heterogeneous nuclear ribonucleoprotein A3                                         | 0.91          | 0.07 |
| 10           | 17.28 | 7           | CMC1_MOUSE   | Q8BH59        | Calcium-binding mitochondrial carrier protein Aralar1                              | 0.60          | 0.09 |
| 19.72        | 22.67 | 15          | GANAB_MOUSE  | Q8BHN3        | Neutral alpha-glucosidase AB precursor                                             | 1.36          | 0.10 |
| 2            | 10.77 | 4           | VATH_MOUSE   | Q8BVE3        | Vacuolar ATP synthase subunit H                                                    | 0.48          | 0.06 |
| 5.28         | 14.81 | 5           | AOFB_MOUSE   | Q8BW75        | Amine oxidase [flavin-containing] B                                                | 0.33          | 0.07 |
| 6.34         | 16.91 | 7           | IMMT_MOUSE   | Q8CAQ8        | Mitochondrial inner membrane protein                                               | 0.61          | 0.16 |
| 7.7          | 37.3  | 5           | H2B1P_MOUSE  | Q8CGP2        | Histone H2B type 1-P                                                               | 0.80          | 0.17 |
| 2.89         | 18.28 | 6           | GMDS_MOUSE   | Q8K0C9        | GDP-mannose 4,6 dehydratase                                                        | 2.32          | 0.30 |
| 4            | 9.19  | 3           | DHSA_MOUSE   | Q8K2B3        | Succinate dehydrogenase [ubiquinone] flavoprotein subunit, mitochondrial precursor | 0.96          | 0.36 |

**Table S1 Summary of the proteins quantitatively identified with 95% confidence in the iTRAQ study (continued)**

| Unused score | %Cov  | Peptide No. | Accession No | SWISS Prot ID | Protein name                                                                            | Fold (MKR/WT) | S.D. |
|--------------|-------|-------------|--------------|---------------|-----------------------------------------------------------------------------------------|---------------|------|
| 2            | 10.17 | 5           | MATR3_MOUSE  | Q8K310        | Matrin-3                                                                                | 0.83          | 0.08 |
| 8.05         | 25.94 | 7           | THIL_MOUSE   | Q8QZT1        | Acetyl-CoA acetyltransferase, mitochondrial precursor                                   | 0.86          | 0.07 |
| 2            | 6.15  | 6           | IF38_MOUSE   | Q8R1B4        | Eukaryotic translation initiation factor 3 subunit 8                                    | 1.24          | 0.10 |
| 2.8          | 25.99 | 4           | TMED4_MOUSE  | Q8R1V4        | Transmembrane emp24 domain-containing protein 4 precursor (p26)                         | 1.86          | 0.62 |
| 24.39        | 48.18 | 17          | ERO1B_MOUSE  | Q8R2E9        | ERO1-like protein beta precursor                                                        | 1.52          | 0.28 |
| 2.03         | 7.64  | 3           | NCLN_MOUSE   | Q8VCM8        | Nicalin precursor                                                                       | 0.58          | 0.06 |
| 10.54        | 14.03 | 18          | MYH9_MOUSE   | Q8VDD5        | Myosin-9 (Myosin heavy chain, nonmuscle IIa)                                            | 0.85          | 0.03 |
| 5.3          | 7.49  | 7           | VIGLN_MOUSE  | Q8VDJ3        | Vigilin (High density lipoprotein-binding protein)                                      | 1.39          | 0.29 |
| 3.52         | 6.44  | 2           | MPCP_MOUSE   | Q8VEM8        | Phosphate carrier protein, mitochondrial precursor (PTP)                                | 0.70          | 0.06 |
| 37.06        | 32.36 | 26          | ACLY_MOUSE   | Q91V92        | ATP-citrate synthase                                                                    | 1.64          | 0.75 |
| 4            | 7.7   | 4           | NDUS1_MOUSE  | Q91VD9        | NADH-ubiquinone oxidoreductase 75 kDa subunit, mitochondrial precursor                  | 0.94          | 0.04 |
| 2            | 8.8   | 13          | GOGA4_MOUSE  | Q91VW5        | Golgin subfamily A member 4                                                             | 1.86          | 0.04 |
| 2            | 25.9  | 6           | TXND5_MOUSE  | Q91W90        | Thioredoxin domain-containing protein 5 precursor                                       | 1.53          | 0.35 |
| 11.17        | 37.32 | 7           | SEGN_MOUSE   | Q91WD9        | Secretagogin                                                                            | 0.73          | 0.09 |
| 4.24         | 18.26 | 7           | RIB1_MOUSE   | Q91YQ5        | Dolichyl-diphosphooligosaccharide--protein glycosyltransferase 67 kDa subunit precursor | 1.70          | 1.06 |
| 14.57        | 21.03 | 9           | DNJC3_MOUSE  | Q91YW3        | DnaJ homolog subfamily C member 3                                                       | 3.04          | 0.82 |
| 2            | 9.06  | 2           | P5CR2_MOUSE  | Q922Q4        | Pyrroline-5-carboxylate reductase 2                                                     | 1.52          | 0.28 |
| 3.7          | 23.45 | 5           | LRC59_MOUSE  | Q922Q8        | Leucine-rich repeat-containing protein 59                                               | 1.67          | 0.41 |
| 27.88        | 47.95 | 16          | PDIA6_MOUSE  | Q922R8        | Protein disulfide-isomerase A6 precursor                                                | 2.25          | 0.38 |
| 2            | 23.3  | 4           | P5CR1_MOUSE  | Q922W5        | Pyrroline-5-carboxylate reductase 1                                                     | 2.85          | 0.62 |
| 1.77         | 17.22 | 5           | PSMD6_MOUSE  | Q99J14        | 26S proteasome non-ATPase regulatory subunit 6                                          | 0.88          | 0.14 |
| 4            | 30.43 | 4           | RAP1B_MOUSE  | Q99J16        | Ras-related protein Rap-1b precursor                                                    | 0.87          | 0.05 |
| 2.34         | 16.63 | 5           | ECHB_MOUSE   | Q99JY0        | Trifunctional enzyme subunit beta, mitochondrial precursor (TP-beta)                    | 0.62          | 0.04 |

**Table S1 Summary of the proteins quantitatively identified with 95% confidence in the iTRAQ study (continued)**

| Unused score | %Cov  | Peptide No. | Accession No | SWISS Prot ID | Protein name                                                                      | Fold (MKR/WT) | S.D. |
|--------------|-------|-------------|--------------|---------------|-----------------------------------------------------------------------------------|---------------|------|
| 6.79         | 32.24 | 5           | TMED9_MOUSE  | Q99KF1        | Transmembrane emp24 domain-containing protein 9 precursor                         | 1.26          | 0.10 |
| 16.4         | 33.08 | 19          | ACON_MOUSE   | Q99KI0        | Aconitate hydratase, mitochondrial precursor                                      | 0.91          | 0.12 |
| 8.05         | 23.46 | 6           | DNJBB_MOUSE  | Q99KV1        | DnaJ homolog subfamily B member 11 precursor                                      | 2.47          | 0.79 |
| 4.49         | 13.75 | 4           | F10A1_MOUSE  | Q99L47        | Hsc70-interacting protein                                                         | 0.96          | 0.47 |
| 2            | 9.91  | 2           | ETFA_MOUSE   | Q99LC5        | Electron transfer flavoprotein subunit alpha, mitochondrial precursor (Alpha-ETF) | 0.57          | 0.06 |
| 4.92         | 50.79 | 5           | PARK7_MOUSE  | Q99LX0        | Protein DJ-1                                                                      | 0.87          | 0.17 |
| 11.37        | 17.13 | 16          | RRBP1_MOUSE  | Q99PL5        | Ribosome-binding protein 1                                                        | 1.83          | 0.15 |
| 8            | 32.35 | 4           | GDIR_MOUSE   | Q99PT1        | Rho GDP-dissociation inhibitor 1                                                  | 1.18          | 0.23 |
| 2            | 18.7  | 4           | 1433B_MOUSE  | Q9CQV8        | 14-3-3 protein beta/alpha                                                         | 0.86          | 0.09 |
| 1.54         | 19.23 | 3           | ACPM_MOUSE   | Q9CR21        | Acyl carrier protein, mitochondrial precursor (ACP)                               | 0.90          | 0.13 |
| 2            | 25.76 | 4           | TMED5_MOUSE  | Q9CXE7        | Transmembrane emp24 domain-containing protein 5 precursor                         | 2.55          | 0.54 |
| 13.24        | 53.63 | 11          | ARMET_MOUSE  | Q9CXI5        | ARMET protein precursor                                                           | 1.81          | 0.54 |
| 2            | 9.09  | 3           | PAIRB_MOUSE  | Q9CY58        | Plasminogen activator inhibitor 1 RNA-binding protein                             | 1.05          | 0.41 |
| 7.74         | 22    | 6           | CREL2_MOUSE  | Q9CYA0        | Cysteine-rich with EGF-like domain protein 2 precursor                            | 3.54          | 1.32 |
| 2            | 17.26 | 3           | SPCS2_MOUSE  | Q9CYN2        | Signal peptidase complex subunit 2                                                | 1.37          | 0.05 |
| 4            | 17.92 | 3           | UQCR1_MOUSE  | Q9CZ13        | Ubiquinol-cytochrome-c reductase complex core protein 1, mitochondrial precursor  | 0.78          | 0.21 |
| 4.02         | 14.44 | 4           | CISY_MOUSE   | Q9CZU6        | Citrate synthase, mitochondrial precursor                                         | 0.64          | 0.06 |
| 4.53         | 25.52 | 2           | RS19_MOUSE   | Q9CZX8        | 40S ribosomal protein S19                                                         | 1.33          | 0.06 |
| 10.52        | 24.76 | 7           | LMAN1_MOUSE  | Q9D0F3        | ERGIC-53 protein precursor                                                        | 1.47          | 0.35 |
| 9.52         | 31.96 | 5           | TMEDA_MOUSE  | Q9D1D4        | Transmembrane emp24 domain-containing protein 10 precursor                        | 1.64          | 0.26 |
| 2.25         | 14.43 | 2           | FKB11_MOUSE  | Q9D1M7        | FK506-binding protein 11 precursor                                                | 2.73          | 0.69 |
| 12.36        | 39.16 | 10          | TXND4_MOUSE  | Q9D1Q6        | Thioredoxin domain-containing protein 4 precursor                                 | 1.71          | 0.24 |

**Table S1 Summary of the proteins quantitatively identified with 95% confidence in the iTRAQ study (continued)**

| Unused score | %Cov  | Peptide No. | Accession No | SWISS Prot ID | Protein name                                                                                                                                        | Fold (MKR/WT) | S.D. |
|--------------|-------|-------------|--------------|---------------|-----------------------------------------------------------------------------------------------------------------------------------------------------|---------------|------|
| 6            | 7.43  | 3           | SC23B_MOUSE  | Q9D662        | Protein transport protein Sec23B                                                                                                                    | 1.63          | 0.78 |
| 2            | 14.78 | 3           | PRPS1_MOUSE  | Q9D7G0        | Ribose-phosphate pyrophosphokinase I                                                                                                                | 0.61          | 0.21 |
| 2.25         | 8.3   | 2           | IPYR_MOUSE   | Q9D819        | Inorganic pyrophosphatase                                                                                                                           | 1.73          | 0.23 |
| 11.79        | 22.2  | 7           | RL4_MOUSE    | Q9D8E6        | 60S ribosomal protein L4                                                                                                                            | 1.74          | 1.09 |
| 3.81         | 31.35 | 9           | EF1G_MOUSE   | Q9D8N0        | Elongation factor 1-gamma                                                                                                                           | 1.49          | 0.47 |
| 2            | 5.26  | 2           | PSD12_MOUSE  | Q9D8W5        | 26S proteasome non-ATPase regulatory subunit 12                                                                                                     | 1.01          | 0.08 |
| 2.72         | 59.72 | 3           | GBG12_MOUSE  | Q9DAS9        | Guanine nucleotide-binding protein G(I)/G(S)/G(O) gamma-12 subunit precursor                                                                        | 0.85          | 0.09 |
| 7.05         | 18.64 | 6           | KAP0_MOUSE   | Q9DBC7        | cAMP-dependent protein kinase type I-alpha regulatory subunit                                                                                       | 1.04          | 0.21 |
| 4            | 8.67  | 2           | ALG2_MOUSE   | Q9DBE8        | Alpha-1,3-mannosyltransferase ALG2                                                                                                                  | 0.87          | 0.02 |
| 4.11         | 14.42 | 5           | RPN2_MOUSE   | Q9DBG6        | Dolichyl-diphosphooligosaccharide--protein glycosyltransferase 63 kDa subunit precursor                                                             | 1.04          | 0.50 |
| 6.05         | 23.46 | 5           | LMAN2_MOUSE  | Q9DBH5        | Vesicular integral-membrane protein VIP36 precursor                                                                                                 | 1.44          | 0.12 |
| 11.3         | 33.07 | 6           | PGAM1_MOUSE  | Q9DBJ1        | Phosphoglycerate mutase 1                                                                                                                           | 1.17          | 0.29 |
| 4            | 23.47 | 3           | KCY_MOUSE    | Q9DBP5        | UMP-CMP kinase                                                                                                                                      | 1.17          | 0.25 |
| 4.01         | 16.21 | 3           | ERGI1_MOUSE  | Q9DC16        | Endoplasmic reticulum-Golgi intermediate compartment protein 1 (ER-Golgi intermediate compartment 32 kDa protein) (ERGIC-32) - Mus musculus (Mouse) | 1.70          | 0.72 |
| 4            | 14.85 | 4           | NDUA9_MOUSE  | Q9DC69        | NADH dehydrogenase [ubiquinone] 1 alpha subcomplex subunit 9, mitochondrial precursor                                                               | 0.54          | 0.05 |
| 9.73         | 30.56 | 6           | NCB5R_MOUSE  | Q9DCN2        | NADH-cytochrome b5 reductase                                                                                                                        | 0.87          | 0.17 |
| 4.04         | 16.35 | 3           | NDUS3_MOUSE  | Q9DCT2        | NADH dehydrogenase [ubiquinone] iron-sulfur protein 3, mitochondrial precursor                                                                      | 0.91          | 0.05 |
| 2.46         | 27.06 | 4           | ETFB_MOUSE   | Q9DCW4        | Electron transfer flavoprotein subunit beta                                                                                                         | 0.66          | 0.05 |
| 6            | 37.27 | 4           | ATP5H_MOUSE  | Q9DCX2        | ATP synthase D chain, mitochondrial                                                                                                                 | 0.76          | 0.19 |
| 2.06         | 32.65 | 2           | PYY_MOUSE    | Q9EPS2        | Peptide YY precursor                                                                                                                                | 0.48          | 0.22 |
| 6.64         | 18.11 | 7           | EHD4_MOUSE   | Q9EQP2        | EH domain-containing protein 4                                                                                                                      | 0.77          | 0.12 |

**Table S1 Summary of the proteins quantitatively identified with 95% confidence in the iTRAQ study (continued)**

| Unused score | %Cov  | Peptide No. | Accession No | SWISS Prot ID | Protein name                                              | Fold (MKR/WT) | S.D. |
|--------------|-------|-------------|--------------|---------------|-----------------------------------------------------------|---------------|------|
| 4            | 21.05 | 2           | IPP1_MOUSE   | Q9ERT9        | Protein phosphatase inhibitor 1                           | 0.59          | 0.24 |
| 12.73        | 16.79 | 9           | COPB_MOUSE   | Q9JIF7        | Coatomer subunit beta                                     | 1.25          | 0.13 |
| 2.04         | 8.93  | 13          | IQGA1_MOUSE  | Q9JKF1        | Ras GTPase-activating-like protein IQGAP1                 | 0.95          | 0.19 |
| 2            | 12.44 | 2           | RHOA_MOUSE   | Q9QUI0        | Transforming protein RhoA precursor                       | 0.83          | 0.10 |
| 4            | 41.21 | 5           | MSAP_MOUSE   | Q9QXT0        | MIR-interacting saposin-like protein precursor            | 1.80          | 0.40 |
| 2.57         | 14.73 | 3           | PCSK1_MOUSE  | Q9QXV0        | ProSAAS precursor                                         | 0.31          | 0.15 |
| 2.14         | 18.93 | 3           | VAPB_MOUSE   | Q9QY76        | Vesicle-associated membrane protein-associated protein B  | 0.83          | 0.12 |
| 7.4          | 14.26 | 6           | SYTL4_MOUSE  | Q9R0Q1        | Synaptotagmin-like protein 4                              | 0.59          | 0.18 |
| 4            | 13.93 | 2           | TMED2_MOUSE  | Q9R0Q3        | Transmembrane emp24 domain-containing protein 2 precursor | 2.12          | 0.42 |
| 2            | 19.51 | 2           | PSB3_MOUSE   | Q9R1P1        | Proteasome subunit beta type 3                            | 1.65          | 0.09 |
| 4            | 19.05 | 2           | LYPA2_MOUSE  | Q9WTL7        | Acyl-protein thioesterase 2                               | 1.23          | 0.53 |
| 2            | 15.59 | 4           | PREB_MOUSE   | Q9WUQ2        | Prolactin regulatory element-binding protein              | 1.09          | 0.01 |
| 2            | 14.35 | 2           | MAAI_MOUSE   | Q9WVL0        | Maleylacetoacetate isomerase                              | 1.49          | 0.17 |
| 4            | 4.15  | 2           | P5CS_MOUSE   | Q9Z110        | Delta 1-pyrroline-5-carboxylate synthetase (P5CS)         | 0.87          | 0.13 |
| 4.05         | 13.32 | 4           | UAP56_MOUSE  | Q9Z1N5        | Spliceosome RNA helicase Bat1                             | 0.72          | 0.09 |
| 2.8          | 6.41  | 4           | SYV_MOUSE    | Q9Z1Q9        | Valyl-tRNA synthetase                                     | 0.74          | 0.03 |
| 2            | 15.48 | 5           | ILF3_MOUSE   | Q9Z1X4        | Interleukin enhancer-binding factor 3                     | 0.86          | 0.07 |
| 7.22         | 15.86 | 5           | DNPEP_MOUSE  | Q9Z2W0        | Aspartyl aminopeptidase                                   | 2.13          | 0.41 |
| 4.12         | 17.83 | 5           | HNRPF_MOUSE  | Q9Z2X1        | Heterogeneous nuclear ribonucleoprotein F                 | 0.92          | 0.03 |

“Unused score”, “%Cov”, and “Peptide No.” represent the result from one iTRAQ experiment. “Fold (MKR/WT)” and “S.D.” are the average value from 3 iTRAQ experiments.

**Table S2 Summary of the quantitatively undefined proteins in the iTRAQ study**

| Unused score | %Cov  | SWISS Prot ID | Accession No. | Protein Name                                                                            | (MKR117:WT114) |         | E.F. |
|--------------|-------|---------------|---------------|-----------------------------------------------------------------------------------------|----------------|---------|------|
|              |       |               |               |                                                                                         | Fold           | p value |      |
| 2            | 14.65 | O08599        | STXB1_MOUSE   | Syntaxin-binding protein 1                                                              | 0.63           |         |      |
| 2            | 3.56  | O08784        | TCOF_MOUSE    | Treacle protein                                                                         | 1.82           |         |      |
| 2            | 7.66  | O08807        | PRDX4_MOUSE   | Peroxiredoxin-4                                                                         | 1.02           |         |      |
| 2            | 17.08 | O09061        | PSB1_MOUSE    | Proteasome subunit beta type 1 precursor                                                | 1.87           |         |      |
| 3.52         | 12.74 | O35166        | GOSR2_MOUSE   | Golgi SNAP receptor complex member 2                                                    | 1.64           | 0.50    | > 2  |
| 2            | 3.99  | O35226        | PSMD4_MOUSE   | 26S proteasome non-ATPase regulatory subunit 4                                          | 1.20           |         |      |
| 2            | 5.04  | O35658        | C1QBP_MOUSE   | Complement component 1 Q subcomponent-binding protein, mitochondrial precursor          | 0.66           |         |      |
| 2.12         | 10.43 | O54734        | OST48_MOUSE   | Dolichyl-diphosphooligosaccharide--protein glycosyltransferase 48 kDa subunit precursor | 0.74           | 0.36    | > 2  |
| 1.4          | 5.50  | O54774        | AP3D1_MOUSE   | AP-3 complex subunit delta-1                                                            | 1.19           |         |      |
| 2            | 7.69  | O55022        | PGRC1_MOUSE   | Membrane-associated progesterone receptor component 1                                   | 1.66           |         |      |
| 2            | 7.69  | O55022        | PGRC1_MOUSE   | Membrane-associated progesterone receptor component 1                                   | 1.56           | 0.26    | > 2  |
| 2            | 15.66 | O55126        | NIPS2_MOUSE   | Protein NipSnap2                                                                        | 0.96           |         |      |
|              | 4.03  | O70456        | 1433S_MOUSE   | 14-3-3 protein sigma                                                                    |                |         |      |
| 1.52         | 22.42 | O70493        | SNX12_MOUSE   | Sorting nexin-12                                                                        | 0.98           | 0.85    | > 2  |
| 2            | 2.31  | O88342        | WDR1_MOUSE    | WD repeat protein 1                                                                     | 1.55           | 0.02    | 1.20 |
| 4            | 16.26 | O88428        | PAPS2_MOUSE   | Bifunctional 3'-phosphoadenosine 5'-phosphosulfate synthetase 2                         | 1.14           | 0.27    | 0.38 |
| 2            | 2.11  | O89001        | CBPD_MOUSE    | Carboxypeptidase D precursor                                                            | 0.90           |         |      |
| 2            | 11.76 | O89086        | RBM3_MOUSE    | Putative RNA-binding protein 3                                                          | 1.25           | 0.15    | 2.00 |
| 2            | 5.05  | P00493        | HPRT_MOUSE    | Hypoxanthine-guanine phosphoribosyltransferase                                          | 0.81           |         |      |
| 2            | 17.68 | P01897        | HA1L_MOUSE    | H-2 class I histocompatibility antigen, L-D alpha chain precursor                       | 0.63           |         |      |
| 9.52         | 39.56 | P05064        | ALDOA_MOUSE   | Fructose-bisphosphate aldolase A                                                        | 0.86           | 0.24    | 1.33 |
| 1.7          | 8.69  | P05480        | SRC_MOUSE     | Neuronal proto-oncogene tyrosine-protein kinase Src                                     | 3.27           |         |      |
| 4.37         | 32.86 | P05784        | K1C18_MOUSE   | Keratin, type I cytoskeletal 18                                                         | 1.01           | 0.95    | 1.52 |
| 2            | 4.72  | P07356        | ANXA2_MOUSE   | Annexin A2                                                                              | 0.64           |         |      |

**Table S2 Summary of the quantitatively undefined proteins in the iTRAQ study (continued)**

| Unused score | %Cov  | SWISS Prot ID | Accession No. | Protein Name                                            | (MKR117:WT114) |         | E.F. |
|--------------|-------|---------------|---------------|---------------------------------------------------------|----------------|---------|------|
|              |       |               |               |                                                         | Fold           | p value |      |
|              | 5.15  | P08103        | HCK_MOUSE     | Tyrosine-protein kinase HCK                             |                |         |      |
| 2            | 2.13  | P09055        | ITB1_MOUSE    | Integrin beta-1 precursor                               | 1.33           |         |      |
| 4            | 18.48 | P10518        | HEM2_MOUSE    | Delta-aminolevulinic acid dehydratase                   | 1.54           | 0.09    | 1.74 |
| 4            | 16.22 | P10605        | CATB_MOUSE    | Cathepsin B precursor                                   | 0.92           | 0.68    | > 2  |
| 2            | 5.27  | P11152        | LIPL_MOUSE    | Lipoprotein lipase precursor                            | 0.05           | 0.01    | 1.93 |
| 1.7          | 13.93 | P11352        | GPX1_MOUSE    | Glutathione peroxidase 1                                | 1.12           | 0.50    | > 2  |
| 1.88         | 10.07 | P11984        | TCPA1_MOUSE   | T-complex protein 1 subunit alpha A                     | 1.00           | 0.99    | > 2  |
| 2            | 6.03  | P13020        | GELS_MOUSE    | Gelsolin precursor                                      | 1.07           |         |      |
| 2            | 8.06  | P13366        | GRAG_MOUSE    | Granzyme G precursor                                    | 1.04           |         |      |
| 1.7          | 2.58  | P13707        | GPDA_MOUSE    | Glycerol-3-phosphate dehydrogenase [NAD+], cytoplasmic  | 1.29           |         |      |
| 2            | 14.81 | P14148        | RL7_MOUSE     | 60S ribosomal protein L7                                |                |         |      |
|              | 1.55  | P14234        | FGR_MOUSE     | Proto-oncogene tyrosine-protein kinase FGR              | 3.27           |         |      |
| 2            | 6.15  | P14576        | SRP54_MOUSE   | Signal recognition particle 54 kDa protein              | 1.47           |         |      |
| 2            | 7.82  | P14733        | LMNB1_MOUSE   | Lamin-B1                                                | 0.72           |         |      |
| 2            | 4.56  | P15105        | GLNA_MOUSE    | Glutamine synthetase                                    | 1.02           |         |      |
|              | 3.67  | P19639        | GSTM4_MOUSE   | Glutathione S-transferase Mu 3                          | 0.68           |         |      |
| 3.53         | 12.23 | P20152        | VIME_MOUSE    | Vimentin                                                | 0.40           | 0.00    | 1.24 |
| 2            | 5.76  | P21550        | ENOB_MOUSE    | Beta-enolase                                            | 0.94           |         |      |
|              | 21.54 | P22752        | H2A1_MOUSE    | Histone H2A type 1                                      |                |         |      |
| 2            | 15.24 | P22907        | HEM3_MOUSE    | Porphobilinogen deaminase                               | 1.21           | 0.25    | 1.67 |
| 2            | 4.17  | P23116        | IF3A_MOUSE    | Eukaryotic translation initiation factor 3 subunit 10   | 0.60           |         |      |
| 2            | 7.55  | P24668        | MPRD_MOUSE    | Cation-dependent mannose-6-phosphate receptor precursor | 0.96           | 0.57    | 1.86 |
|              | 6.45  | P25911        | LYN_MOUSE     | Tyrosine-protein kinase Lyn                             |                |         |      |
| 5.45         | 8.38  | P26039        | TLN1_MOUSE    | Talin-1                                                 | 1.02           | 0.91    | 1.61 |
| 2.01         | 15.36 | P26040        | EZRI_MOUSE    | Ezrin (p81)                                             | 1.33           | 0.18    | 1.81 |
| 2            | 13.36 | P26231        | CTNA1_MOUSE   | Catenin alpha-1                                         | 1.23           | 0.10    | 1.54 |
|              | 22.38 | P27661        | H2AX_MOUSE    | Histone H2A.x                                           | 1.27           | 0.00    | 1.13 |
| 1.4          | 2.21  | P28798        | GRN_MOUSE     | Granulins precursor                                     | 0.87           | 0.04    | 1.14 |
| 6            | 17.92 | P29341        | PABP1_MOUSE   | Polyadenylate-binding protein 1                         | 0.86           | 0.21    | 1.34 |

**Table S2 Summary of the quantitatively undefined proteins in the iTRAQ study (continued)**

| Unused score | %Cov  | SWISS Prot ID | Accession No. | Protein Name                                                                   | (MKR117:WT114) |         | E.F. |
|--------------|-------|---------------|---------------|--------------------------------------------------------------------------------|----------------|---------|------|
|              |       |               |               |                                                                                | Fold           | p value |      |
|              | 18.24 | P29387        | GBB4_MOUSE    | Guanine nucleotide-binding protein subunit beta 4                              |                |         |      |
| 2            | 17.28 | P29595        | NEDD8_MOUSE   | NEDD8 precursor                                                                | 0.96           |         |      |
| 1.4          | 15.24 | P30681        | HMGB2_MOUSE   | High mobility group protein B2                                                 | 0.63           |         |      |
| 2            | 8.41  | P32020        | NLTP_MOUSE    | Nonspecific lipid-transfer protein                                             | 1.47           | 0.04    | 1.42 |
| 2.59         | 16.75 | P34022        | RANG_MOUSE    | Ran-specific GTPase-activating protein                                         | 1.44           | 0.02    | 1.31 |
| 1.7          | 7.83  | P34884        | MIF_MOUSE     | Macrophage migration inhibitory factor (MIF)                                   | 0.91           | 0.13    | 1.27 |
| 1.7          | 7.83  | P34884        | MIF_MOUSE     | Macrophage migration inhibitory factor (MIF)                                   | 1.01           | 0.95    | > 2  |
| 3.7          | 13.91 | P34884        | MIF_MOUSE     | Macrophage migration inhibitory factor (MIF)                                   | 1.05           | 0.73    | 1.39 |
| 2            | 16.16 | P36536        | SAR1A_MOUSE   | GTP-binding protein SAR1a                                                      | 1.18           |         |      |
| 2.04         | 8.85  | P37040        | NCPR_MOUSE    | NADPH--cytochrome P450 reductase                                               | 0.59           | 0.09    | > 2  |
| 2            | 4.62  | P41731        | CD63_MOUSE    | CD63 antigen                                                                   | 1.17           | 0.19    | 1.41 |
|              | 14.16 | P43274        | H14_MOUSE     | Histone H1.4                                                                   |                |         |      |
| 2.42         | 10.41 | P43277        | H13_MOUSE     | Histone H1.3                                                                   | 3.78           | 0.00    | 1.42 |
| 2            | 6.00  | P46471        | PRS7_MOUSE    | 26S protease regulatory subunit 7                                              | 0.82           | 0.18    | 1.54 |
| 2            | 6.29  | P47754        | CAZA2_MOUSE   | F-actin capping protein subunit alpha-2                                        | 0.82           | 0.31    | > 2  |
| 2            | 14.40 | P47791        | GSHR_MOUSE    | Glutathione reductase, mitochondrial precursor                                 | 0.95           | 0.62    | 1.41 |
| 2            | 11.85 | P47963        | RL13_MOUSE    | 60S ribosomal protein L13                                                      | 1.03           | 0.71    | > 2  |
| 2            | 9.39  | P50580        | PA2G4_MOUSE   | Proliferation-associated protein 2G4                                           | 0.95           |         |      |
| 2            | 6.76  | P51150        | RAB7_MOUSE    | Ras-related protein Rab-7                                                      | 1.47           |         |      |
| 2.82         | 27.59 | P52503        | NDUS6_MOUSE   | NADH dehydrogenase [ubiquinone] iron-sulfur protein 6, mitochondrial precursor | 2.30           | 0.00    | 1.20 |
| 2            | 12.16 | P52825        | CPT2_MOUSE    | Carnitine O-palmitoyltransferase 2, mitochondrial precursor                    | 0.45           | 0.10    | 1.25 |
| 1.4          | 13.07 | P53657        | KPYR_MOUSE    | Pyruvate kinase isozymes R/L                                                   | 0.52           |         |      |
| 2            | 5.31  | P55937        | GOGA3_MOUSE   | Golgin subfamily A member 3                                                    | 0.95           |         |      |
| 2            | 13.79 | P56379        | 68MP_MOUSE    | 6.8 kDa mitochondrial proteolipid                                              | 0.69           | 0.00    | 1.08 |
| 3.57         | 53.49 | P56391        | CX6B1_MOUSE   | Cytochrome c oxidase subunit VIb isoform 1                                     | 1.03           | 0.51    | 1.13 |
| 1.3          | 1.74  | P56959        | FUS_MOUSE     | RNA-binding protein FUS                                                        | 0.65           |         |      |
| 2            | 4.83  | P56959        | FUS_MOUSE     | RNA-binding protein FUS                                                        | 0.59           |         |      |
| 2            | 33.48 | P58044        | IDI1_MOUSE    | Isopentenyl-diphosphate Delta-isomerase 1                                      | 1.05           |         |      |
|              | 24.30 | P58771        | TPM1_MOUSE    | Tropomyosin 1 alpha chain                                                      |                |         |      |

**Table S2 Summary of the quantitatively undefined proteins in the iTRAQ study (continued)**

| Unused score | %Cov  | SWISS Prot ID | Accession No. | Protein Name                                                           | (MKR117:WT114) |         | E.F. |
|--------------|-------|---------------|---------------|------------------------------------------------------------------------|----------------|---------|------|
|              |       |               |               |                                                                        | Fold           | p value |      |
| 3.71         | 22.69 | P60867        | RS20_MOUSE    | 40S ribosomal protein S20                                              | 0.83           | 0.15    | 1.41 |
| 6.14         | 34.21 | P61089        | UBE2N_MOUSE   | Ubiquitin-conjugating enzyme E2 N                                      | 0.90           | 0.61    | 1.78 |
| 2            | 8.84  | P61211        | ARL1_MOUSE    | ADP-ribosylation factor-like protein 1                                 | 1.15           | 0.28    | 1.50 |
| 2            | 8.84  | P61211        | ARL1_MOUSE    | ADP-ribosylation factor-like protein 1                                 | 1.15           |         |      |
| 2            | 13.89 | P61750        | ARF4_MOUSE    | ADP-ribosylation factor 4                                              | 2.00           |         |      |
| 2            | 11.34 | P62082        | RS7_MOUSE     | 40S ribosomal protein S7                                               | 0.96           |         |      |
|              | 9.39  | P62137        | PP1A_MOUSE    | Serine/threonine-protein phosphatase PP1-alpha catalytic subunit       | 1.07           |         |      |
| 2            | 4.20  | P61620        | S61A1_MOUSE   | Protein transport protein Sec61 subunit alpha isoform 1                | 1.27           | 0.10    | 1.59 |
| 2            | 10.73 | P61924        | COPZ1_MOUSE   | Coatomer subunit zeta-1                                                | 1.32           |         |      |
| 2            | 15.82 | P61924        | COPZ1_MOUSE   | Coatomer subunit zeta-1                                                | 1.58           |         |      |
| 4            | 18.04 | P62141        | PP1B_MOUSE    | Serine/threonine-protein phosphatase PP1-beta catalytic subunit        | 1.07           |         |      |
| 2            | 11.96 | P62305        | RUXE_MOUSE    | Small nuclear ribonucleoprotein E                                      | 0.85           |         |      |
| 2.28         | 27.73 | P62315        | SMD1_MOUSE    | Small nuclear ribonucleoprotein Sm D1                                  | 0.94           | 0.39    | 1.26 |
| 2            | 13.37 | P62334        | PRS10_MOUSE   | 26S protease regulatory subunit S10B                                   | 0.71           |         |      |
| 2            | 27.38 | P62702        | RS4X_MOUSE    | 40S ribosomal protein S4, X isoform                                    |                |         |      |
|              | 9.71  | P62715        | PP2AB_MOUSE   | Serine/threonine-protein phosphatase 2A catalytic subunit beta isoform |                |         |      |
| 1.7          | 5.77  | P62751        | RL23A_MOUSE   | 60S ribosomal protein L23a                                             | 1.38           | 0.03    | 1.77 |
| 2            | 6.02  | P62754        | RS6_MOUSE     | 40S ribosomal protein S6                                               | 0.97           | 0.60    | 1.77 |
| 1.4          | 14.41 | P62774        | MTPN_MOUSE    | Myotrophin                                                             | 0.63           |         |      |
| 2            | 16.20 | P62827        | RAN_MOUSE     | GTP-binding nuclear protein Ran                                        | 1.04           | 0.42    | 1.45 |
| 2            | 25.00 | P62830        | RL23_MOUSE    | 60S ribosomal protein L23                                              | 0.91           |         |      |
| 2            | 17.93 | P62843        | RS15_MOUSE    | 40S ribosomal protein S15                                              | 1.09           | 0.23    | 1.19 |
| 2            | 13.04 | P62855        | RS26_MOUSE    | 40S ribosomal protein S26                                              | 1.02           | 0.89    | > 2  |
| 2            | 17.39 | P62858        | RS28_MOUSE    | 40S ribosomal protein S28                                              | 1.54           |         |      |
| 3.52         | 12.94 | P62880        | GBB2_MOUSE    | Guanine nucleotide-binding protein G(I)/G(S)/G(T) subunit beta 2       | 0.71           | 0.17    | 1.83 |
| 2            | 11.20 | P62900        | RL31_MOUSE    | 60S ribosomal protein L31                                              | 1.22           | 0.19    | > 2  |

**Table S2 Summary of the quantitatively undefined proteins in the iTRAQ study (continued)**

| Unused score | %Cov  | SWISS Prot ID | Accession No. | Protein Name                                                            | (MKR117:WT114) |         | E.F. |
|--------------|-------|---------------|---------------|-------------------------------------------------------------------------|----------------|---------|------|
|              |       |               |               |                                                                         | Fold           | p value |      |
| 2            | 14.29 | P68037        | UB2L3_MOUSE   | Ubiquitin-conjugating enzyme E2 L3                                      | 1.01           | 0.89    | > 2  |
|              | 16.50 | P63024        | VAMP3_MOUSE   | Vesicle-associated membrane protein 3                                   |                |         |      |
|              | 9.60  | P63087        | PP1G_MOUSE    | Serine/threonine-protein phosphatase PP1-gamma catalytic subunit        | 1.07           |         |      |
| 4            | 13.92 | P63330        | PP2AA_MOUSE   | Serine/threonine-protein phosphatase 2A catalytic subunit alpha isoform | 1.05           | 0.33    | 1.20 |
| 7.4          | 22.99 | P68368        | TBA4_MOUSE    | Tubulin alpha-4 chain                                                   | 1.00           | 0.93    | 1.09 |
| 4            | 47.67 | P68369        | TBA1_MOUSE    | Tubulin alpha-1 chain                                                   | 0.96           | 0.56    | 1.15 |
|              |       | P68373        | TBA6_MOUSE    | Tubulin alpha-6 chain                                                   | 1.00           | 0.93    | 1.09 |
| 2            | 3.79  | P70333        | HNRH2_MOUSE   | Heterogeneous nuclear ribonucleoprotein H'                              | 0.95           |         |      |
| 2            | 13.49 | P70404        | IDH3G_MOUSE   | Isocitrate dehydrogenase [NAD] subunit gamma, mitochondrial precursor   |                |         |      |
| 5.6          | 13.27 | P80314        | TCPB_MOUSE    | T-complex protein 1 subunit beta                                        | 1.08           | 0.46    | 1.35 |
| 2            | 8.91  | P80315        | TCPD_MOUSE    | T-complex protein 1 subunit delta                                       | 0.72           | 0.01    | 1.09 |
| 4            | 17.80 | P80318        | TCPG_MOUSE    | T-complex protein 1 subunit gamma                                       | 0.79           | 0.31    | > 2  |
| 1.3          | 6.69  | P97372        | PSME2_MOUSE   | Proteasome activator complex subunit 2                                  | 0.77           |         |      |
| 2            | 6.69  | P97372        | PSME2_MOUSE   | Proteasome activator complex subunit 2                                  | 0.84           |         |      |
| 1.46         | 13.48 | P97429        | ANXA4_MOUSE   | Annexin A4                                                              | 0.62           |         |      |
| 2            | 12.96 | P97450        | ATP5J_MOUSE   | ATP synthase coupling factor 6, mitochondrial precursor                 | 1.16           |         |      |
| 2            | 6.86  | P97461        | RS5_MOUSE     | 40S ribosomal protein S5                                                | 0.97           |         |      |
| 2            | 7.31  | P97822        | AN32E_MOUSE   | Acidic leucine-rich nuclear phosphoprotein 32 family member E           | 0.58           |         |      |
| 2            | 8.33  | P99026        | PSB4_MOUSE    | Proteasome subunit beta type 4 precursor                                | 1.62           | 0.03    | 1.32 |
| 1.7          | 3.88  | Q04736        | YES_MOUSE     | Proto-oncogene tyrosine-protein kinase Yes                              | 0.70           |         |      |
| 2            | 11.16 | Q06890        | CLUS_MOUSE    | Clusterin precursor                                                     | 0.50           |         |      |
| 3.4          | 13.82 | Q07076        | ANXA7_MOUSE   | Annexin A7                                                              | 0.80           | 0.25    | > 2  |
| 2            | 7.61  | Q11011        | PSA_MOUSE     | Puromycin-sensitive aminopeptidase                                      | 0.32           |         |      |
|              | 46.09 | Q3THW5        | H2AV_MOUSE    | Histone H2AV                                                            |                |         |      |
| 2            | 8.60  | Q3TXS7        | PSMD1_MOUSE   | 26S proteasome non-ATPase regulatory subunit 1                          |                |         |      |
| 2            | 3.90  | Q4PZA2        | ECE1_MOUSE    | Endothelin-converting enzyme 1                                          | 0.90           | 0.45    | > 2  |

**Table S2 Summary of the quantitatively undefined proteins in the iTRAQ study (continued)**

| Unused score | %Cov  | SWISS Prot ID | Accession No. | Protein Name                                                    | (MKR117:WT114) |         | E.F. |
|--------------|-------|---------------|---------------|-----------------------------------------------------------------|----------------|---------|------|
|              |       |               |               |                                                                 | Fold           | p value |      |
| 2            | 7.12  | Q571E4        | GALNS_MOUSE   | N-acetylgalactosamine-6-sulfatase precursor                     | 1.48           | 0.22    | > 2  |
| 2            | 2.25  | Q60673        | PTPRN_MOUSE   | Receptor-type tyrosine-protein phosphatase-like N precursor     | 0.56           |         |      |
| 1.7          | 27.73 | Q60692        | PSB6_MOUSE    | Proteasome subunit beta type 6 precursor                        | 1.98           |         |      |
|              | 6.98  | Q60817        | NACA_MOUSE    | Nascent polypeptide-associated complex subunit alpha            |                |         |      |
| 5.05         | 11.79 | Q60864        | STIP1_MOUSE   | Stress-induced-phosphoprotein 1                                 | 1.06           | 0.37    | 1.17 |
| 2            | 12.98 | Q60967        | PAPS1_MOUSE   | Bifunctional 3'-phosphoadenosine 5'-phosphosulfate synthetase 1 | 1.56           |         |      |
| 2            | 11.36 | Q61025        | IFT20_MOUSE   | Intraflagellar transport 20 homolog                             | 2.47           |         |      |
| 2.98         | 10.23 | Q61316        | HSP74_MOUSE   | Heat shock 70 kDa protein 4                                     | 1.15           | 0.12    | 1.21 |
| 2            | 7.69  | Q61753        | SERA_MOUSE    | D-3-phosphoglycerate dehydrogenase                              | 1.37           | 0.21    | > 2  |
| 1.52         | 6.72  | Q61941        | NNTM_MOUSE    | NAD(P) transhydrogenase, mitochondrial precursor                | 0.58           |         |      |
|              | 7.77  | Q62159        | RHOC_MOUSE    | Rho-related GTP-binding protein RhoC precursor                  | 0.75           |         |      |
| 2            | 11.05 | Q62186        | SSRD_MOUSE    | Translocon-associated protein subunit delta precursor           | 1.23           | 0.33    | 1.66 |
| 2            | 12.20 | Q62425        | NDUA4_MOUSE   | NADH dehydrogenase [ubiquinone] 1 alpha subcomplex subunit 4    | 0.70           |         |      |
| 2            | 21.43 | Q62426        | CYTB_MOUSE    | Cystatin-B                                                      |                |         |      |
| 2            | 5.42  | Q64471        | GSTT1_MOUSE   | Glutathione S-transferase theta-1                               | 0.51           |         |      |
| 5.7          | 24.62 | Q64522        | H2A2B_MOUSE   | Histone H2A type 2-B                                            | 1.26           | 0.00    | 1.12 |
|              | 37.30 | Q64475        | H2B1B_MOUSE   | Histone H2B type 1-B                                            |                |         |      |
| 1.7          | 4.37  | Q6IRU5        | CLCB_MOUSE    | Clathrin light chain B                                          | 1.80           |         |      |
| 2            | 4.37  | Q6IRU5        | CLCB_MOUSE    | Clathrin light chain B                                          | 1.68           | 0.02    | 1.33 |
| 2            | 6.90  | Q6NVF9        | CPSF6_MOUSE   | Cleavage and polyadenylation specificity factor 6               | 0.97           | 0.88    | > 2  |
| 2            | 4.71  | Q6NZC7        | S23IP_MOUSE   | SEC23-interacting protein                                       | 1.80           |         |      |
| 2            | 8.35  | Q6P5G6        | UBXD7_MOUSE   | UBX domain-containing protein 7                                 | 0.89           | 0.29    | > 2  |
| 2            | 18.95 | Q6PDM2        | SFRS1_MOUSE   | Splicing factor, arginine/serine-rich 1                         | 0.96           | 0.27    | 1.25 |
| 2.29         | 21.96 | Q6ZWV3        | RL10_MOUSE    | 60S ribosomal protein L10                                       | 1.04           | 0.87    | > 2  |
|              | 26.98 | Q6ZWY9        | H2B1C_MOUSE   | Histone H2B type 1-C/E/G                                        |                |         |      |
| 2            | 8.60  | Q78IS1        | TMED3_MOUSE   | Transmembrane emp24 domain-containing protein 3 precursor       | 1.74           |         |      |

**Table S2 Summary of the quantitatively undefined proteins in the iTRAQ study (continued)**

| Unused score | %Cov  | SWISS Prot ID | Accession No. | Protein Name                                              | (MKR117:WT114) |         | E.F. |
|--------------|-------|---------------|---------------|-----------------------------------------------------------|----------------|---------|------|
|              |       |               |               |                                                           | Fold           | p value |      |
| 2            | 8.60  | Q78IS1        | TMED3_MOUSE   | Transmembrane emp24 domain-containing protein 3 precursor | 2.87           | 0.00    | 1.16 |
| 2            | 8.60  | Q78IS1        | TMED3_MOUSE   | Transmembrane emp24 domain-containing protein 3 precursor | 1.91           |         |      |
| 10           | 18.79 | Q78PY7        | SND1_MOUSE    | Staphylococcal nuclease domain-containing protein 1       | 0.88           | 0.11    | 1.18 |
| 6            | 15.41 | Q7TMK9        | HNRPQ_MOUSE   | Heterogeneous nuclear ribonucleoprotein Q                 | 1.07           | 0.26    | 1.14 |
| 1.7          | 3.72  | Q9Z2M7        | PMM2_MOUSE    | Phosphomannomutase 2                                      | 0.94           |         |      |
| 2            | 4.52  | Q7TSV4        | PGM2_MOUSE    | Phosphoglucomutase-2                                      | 1.22           |         |      |
| 1.4          | 4.50  | Q80TJ1        | CAPS1_MOUSE   | Calcium-dependent secretion activator 1                   | 0.37           |         |      |
| 2            | 3.48  | Q80UM7        | GCS1_MOUSE    | Mannosyl-oligosaccharide glucosidase                      | 0.91           | 0.51    | 1.65 |
| 2            | 14.29 | Q80UU9        | PGRC2_MOUSE   | Membrane-associated progesterone receptor component 2     | 1.77           |         |      |
| 2.05         | 5.47  | Q80W54        | FACE1_MOUSE   | CAAX prenyl protease 1 homolog                            | 1.03           | 0.81    | > 2  |
| 2            | 12.50 | Q80WM4        | HPLN4_MOUSE   | Hyaluronan and proteoglycan link protein 4 precursor      | 0.67           |         |      |
| 2            | 11.85 | Q8BG32        | PSD11_MOUSE   | 26S proteasome non-ATPase regulatory subunit 11           | 0.87           |         |      |
| 2            | 9.82  | Q8BGD9        | IF4B_MOUSE    | Eukaryotic translation initiation factor 4B               | 1.48           |         |      |
| 2            | 2.58  | Q8BGQ7        | SYAC_MOUSE    | Alanyl-tRNA synthetase, cytoplasmic                       | 0.91           |         |      |
| 1.52         | 7.84  | Q8BGY2        | IF5A2_MOUSE   | Eukaryotic translation initiation factor 5A-2             | 0.97           |         |      |
| 2            | 6.55  | Q8BH95        | ECHM_MOUSE    | Enoyl-CoA hydratase, mitochondrial precursor              | 0.74           |         |      |
| 2            | 8.58  | Q8BLF1        | ADCL1_MOUSE   | Arylacetamide deacetylase-like 1                          |                |         |      |
| 4.79         | 36.17 | Q8BMK4        | CKAP4_MOUSE   | Cytoskeleton-associated protein 4                         | 1.50           | 0.20    | 1.99 |
| 2.48         | 13.38 | Q8BP67        | RL24_MOUSE    | 60S ribosomal protein L24                                 | 1.00           | 0.98    | 1.20 |
| 2            | 12.36 | Q8BRF7        | SCFD1_MOUSE   | Sec1 family domain-containing protein 1                   | 0.93           | 0.55    | 1.51 |
|              | 12.71 | Q8BSL7        | ARF2_MOUSE    | ADP-ribosylation factor 2                                 | 1.00           | 0.99    | > 2  |
| 2            | 5.39  | Q8BVI4        | DHPR_MOUSE    | Dihydropteridine reductase                                |                |         |      |
| 2            | 9.71  | Q8CCJ3        | K0776_MOUSE   | Protein KIAA0776                                          | 0.87           | 2       | > 2  |
| 1.52         | 12.04 | Q8CGC7        | SYEP_MOUSE    | Bifunctional aminoacyl-tRNA synthetase                    | 1.25           | 1.52    | > 2  |
|              | 21.88 | Q8CGP6        | H2A1H_MOUSE   | Histone H2A type 1-H                                      |                |         |      |
| 4            | 21.54 | Q8CGP7        | H2A1K_MOUSE   | Histone H2A type 1-K                                      | 0.62           | 0.00    | 1.21 |
| 4            | 21.54 | Q8CGP7        | H2A1K_MOUSE   | Histone H2A type 1-K                                      | 0.66           | 0.02    | 1.36 |

**Table S2 Summary of the quantitatively undefined proteins in the iTRAQ study (continued)**

| Unused score | %Cov  | SWISS Prot ID | Accession No. | Protein Name                                                            | <b>(MKR117:WT114)</b> |         | E.F. |
|--------------|-------|---------------|---------------|-------------------------------------------------------------------------|-----------------------|---------|------|
|              |       |               |               |                                                                         | Fold                  | p value |      |
| 4            | 21.54 | Q8CGP7        | H2A1K_MOUSE   | Histone H2A type 1-K                                                    | 0.44                  | 0.00    | 1.18 |
| 2            | 2.88  | Q8R081        | HNRPL_MOUSE   | Heterogeneous nuclear ribonucleoprotein L                               | 0.52                  |         |      |
| 2            | 11.60 | Q8R2Y8        | PTH2_MOUSE    | Peptidyl-tRNA hydrolase 2, mitochondrial precursor                      | 1.26                  |         |      |
| 4.1          | 11.94 | Q8R311        | CTGE5_MOUSE   | Cutaneous T-cell lymphoma-associated antigen 5 homolog                  | 0.84                  | 0.61    | > 2  |
| 2            | 10.64 | Q8R5J9        | PRAF3_MOUSE   | PRA1 family protein 3                                                   | 0.52                  |         |      |
| 2            | 12.38 | Q8VC28        | AK1CD_MOUSE   | Aldo-keto reductase family 1 member C13                                 | 0.69                  |         |      |
| 2            | 11.08 | Q8VCT3        | AMPB_MOUSE    | Aminopeptidase B                                                        | 0.64                  | 0.72    | 1.47 |
| 2            | 11.41 | Q8VE47        | UE1D1_MOUSE   | Ubiquitin-activating enzyme E1 domain-containing protein 1              | 0.76                  |         |      |
| 2            | 7.45  | Q8VEH8        | XTP3B_MOUSE   | XTP3-transactivated gene B protein homolog precursor                    |                       |         |      |
| 2.42         | 19.31 | Q8VHC3        | SELM_MOUSE    | Thioredoxin-like selenoprotein M precursor                              | 1.40                  | 0.48    | > 2  |
| 2            | 12.50 | Q8VHE0        | SEC63_MOUSE   | Translocation protein SEC63 homolog                                     | 0.90                  |         |      |
| 2            | 2.43  | Q8VIJ6        | SFPQ_MOUSE    | Splicing factor, proline- and glutamine-rich                            | 0.93                  |         |      |
| 2            | 2.43  | Q8VIJ6        | SFPQ_MOUSE    | Splicing factor, proline- and glutamine-rich                            | 1.03                  | 0.62    | 1.25 |
| 2            | 5.29  | Q8VIJ6        | SFPQ_MOUSE    | Splicing factor, proline- and glutamine-rich                            | 1.07                  |         |      |
| 2.05         | 15.35 | Q91VI7        | RINI_MOUSE    | Ribonuclease inhibitor                                                  | 0.98                  |         |      |
| 2.22         | 9.59  | Q91VR5        | DDX1_MOUSE    | ATP-dependent RNA helicase DDX1                                         | 1.05                  | 0.73    | > 2  |
| 2            | 10.14 | Q91WJ8        | FUBP1_MOUSE   | Far upstream element-binding protein 1                                  | 1.02                  |         |      |
| 2            | 12.04 | Q91WS0        | ZCD1_MOUSE    | Zinc finger CDGSH domain-containing protein 1                           | 0.77                  |         |      |
| 2            | 5.75  | Q91XF0        | PNPO_MOUSE    | Pyridoxine-5'-phosphate oxidase                                         | 2.23                  |         |      |
| 2.02         | 9.15  | Q91Z53        | GRHPR_MOUSE   | Glyoxylate reductase/hydroxypyruvate reductase                          | 1.30                  | 0.70    | > 2  |
| 2            | 13.15 | Q91YT0        | NDUV1_MOUSE   | NADH dehydrogenase [ubiquinone] flavoprotein 1, mitochondrial precursor |                       |         |      |
|              | 1.51  | Q91Z31        | PTBP2_MOUSE   | Polypyrimidine tract-binding protein 2                                  |                       |         |      |
| 4            | 7.93  | Q920E5        | FPPS_MOUSE    | Farnesyl pyrophosphate synthetase                                       | 0.76                  | 0.09    | 1.49 |
| 1.4          | 3.97  | Q921L5        | COG2_MOUSE    | Conserved oligomeric Golgi complex component 2                          | 0.95                  |         |      |
| 1.74         | 4.81  | Q922D8        | C1TC_MOUSE    | C-1-tetrahydrofolate synthase, cytoplasmic                              | 0.64                  | 0.11    | > 2  |
| 1.4          | 18.99 | Q99JT9        | MTND_MOUSE    | 1,2-dihydroxy-3-keto-5-methylthiopentene dioxygenase                    | 0.88                  |         |      |

**Table S2 Summary of the quantitatively undefined proteins in the iTRAQ study (continued)**

| Unused score | %Cov  | SWISS Prot ID | Accession No. | Protein Name                                                                           | (MKR117:WT114) |         | E.F. |
|--------------|-------|---------------|---------------|----------------------------------------------------------------------------------------|----------------|---------|------|
|              |       |               |               |                                                                                        | Fold           | p value |      |
| 4.35         | 11.57 | Q93092        | TALDO_MOUSE   | Transaldolase                                                                          | 0.95           | 0.75    | 1.78 |
| 2.08         | 11.09 | Q99JX3        | GORS2_MOUSE   | Golgi reassembly-stacking protein 2                                                    | 1.36           |         |      |
| 8.92         | 22.49 | Q99JY9        | ARP3_MOUSE    | Actin-like protein 3                                                                   | 0.84           | 0.09    | 1.24 |
| 2            | 3.47  | Q99KK2        | NEUA_MOUSE    | N-acylneuraminate cytidyltransferase                                                   | 3.95           |         |      |
| 2            | 2.78  | Q99KP6        | PRP19_MOUSE   | Pre-mRNA-processing factor 19                                                          | 0.87           |         |      |
| 2            | 7.04  | Q99LC3        | NDUAA_MOUSE   | NADH dehydrogenase [ubiquinone] 1 alpha subcomplex subunit 10, mitochondrial precursor | 0.62           |         |      |
| 2.54         | 17.23 | Q99LF4        | CV028_MOUSE   | UPF0027 protein C22orf28 homolog                                                       | 0.98           | 0.58    | 1.18 |
| 2            | 30.30 | Q99LT0        | DPY30_MOUSE   | Dpy-30-like protein                                                                    | 1.03           | 0.37    | 1.12 |
| 2            | 17.24 | Q9CPP6        | NDUA5_MOUSE   | NADH dehydrogenase [ubiquinone] 1 alpha subcomplex subunit 5                           | 0.89           | 0.07    | 1.03 |
| 5.7          | 34.24 | Q9CPU0        | LGUL_MOUSE    | Lactoylglutathione lyase                                                               | 0.88           | 0.10    | 1.19 |
| 2            | 11.63 | Q9CQ19        | MLRN_MOUSE    | Myosin regulatory light chain 2, smooth muscle isoform                                 | 1.52           | 0.37    | > 2  |
| 4            | 14.79 | Q9CQ60        | 6PGL_MOUSE    | 6-phosphogluconolactonase                                                              | 0.88           |         |      |
| 2            | 4.36  | Q9CQF9        | PCYOX_MOUSE   | Preylcysteine oxidase precursor                                                        |                |         |      |
|              | 1.98  | Q9CQN1        | TRAP1_MOUSE   | Heat shock protein 75 kDa, mitochondrial precursor                                     |                |         |      |
| 2            | 5.86  | Q9CQQ7        | AT5F1_MOUSE   | ATP synthase B chain, mitochondrial precursor                                          | 0.59           |         |      |
| 1.89         | 33.73 | Q9CQR2        | RS21_MOUSE    | 40S ribosomal protein S21                                                              | 1.18           | 0.46    | > 2  |
| 2            | 7.78  | Q9CR09        | UFC1_MOUSE    | Ufm1-conjugating enzyme 1                                                              | 1.63           | 0.03    | 1.28 |
| 1.52         | 12.97 | Q9CR16        | PPID_MOUSE    | 40 kDa peptidyl-prolyl cis-trans isomerase                                             | 0.83           | 0.57    | > 2  |
| 2            | 9.49  | Q9CR68        | UCRI_MOUSE    | Ubiquinol-cytochrome c reductase iron-sulfur subunit, mitochondrial precursor          |                |         |      |
| 2            | 10.87 | Q9CR60        | GOT1B_MOUSE   | Vesicle transport protein GOT1B                                                        | 1.00           | 0.99    | > 2  |
| 2            | 16.26 | Q9CSU0        | CT077_MOUSE   | Uncharacterized protein C20orf77 homolog                                               | 0.56           |         |      |
| 2            | 4.60  | Q9CSU0        | CT077_MOUSE   | Uncharacterized protein C20orf77 homolog                                               | 0.63           |         |      |
|              | 24.94 | Q9CWF2        | TBB2B_MOUSE   | Tubulin beta-2B chain                                                                  | 0.95           |         |      |
| 1.3          | 1.52  | Q9CWJ9        | PUR9_MOUSE    | Bifunctional purine biosynthesis protein PURH                                          | 1.00           |         |      |
| 2            | 4.05  | Q9CWJ9        | PUR9_MOUSE    | Bifunctional purine biosynthesis protein PURH                                          | 0.50           |         |      |
| 2            | 8.88  | Q9CXR1        | DHR57_MOUSE   | Dehydrogenase/reductase SDR family member 7 precursor                                  | 2.16           |         |      |

**Table S2 Summary of the quantitatively undefined proteins in the iTRAQ study (continued)**

| Unused score | %Cov  | SWISS Prot ID | Accession No. | Protein Name                                                                         | (MKR117:WT114) |         | E.F. |
|--------------|-------|---------------|---------------|--------------------------------------------------------------------------------------|----------------|---------|------|
|              |       |               |               |                                                                                      | Fold           | p value |      |
| 2            | 13.27 | Q9CXU9        | EIF1B_MOUSE   | Eukaryotic translation initiation factor 1b                                          | 1.82           |         |      |
| 1.52         | 7.87  | Q9CXW4        | RL11_MOUSE    | 60S ribosomal protein L11                                                            | 1.01           | 0.86    | 1.65 |
| 2            | 8.57  | Q9CXZ1        | NDUS4_MOUSE   | NADH dehydrogenase [ubiquinone] iron-sulfur protein 4, mitochondrial precursor       | 0.69           |         |      |
| 2            | 37.73 | Q9CYZ2        | TPD54_MOUSE   | Tumor protein D54                                                                    | 0.90           | 0.82    | > 2  |
| 2            | 5.30  | Q9CZ30        | GTPB9_MOUSE   | Putative GTP-binding protein 9                                                       | 1.12           |         |      |
| 2            | 8.92  | Q9CZ44        | NSF1C_MOUSE   | NSFL1 cofactor p47                                                                   | 1.65           |         |      |
| 2            | 3.14  | Q9CZC8        | SCRN1_MOUSE   | Secernin-1                                                                           | 1.26           | 0.02    | 1.14 |
| 4            | 7.68  | Q9CZD3        | SYG_MOUSE     | Glycyl-tRNA synthetase                                                               | 1.09           | 0.22    | 1.24 |
| 2            | 7.31  | Q9CZT8        | RAB3B_MOUSE   | Ras-related protein Rab-3B                                                           | 0.30           | 0.01    | 1.51 |
| 3.4          | 6.95  | Q9D020        | 5NT3_MOUSE    | Cytosolic 5'-nucleotidase III                                                        | 0.77           | 0.14    | 1.61 |
| 2            | 4.46  | Q9D051        | ODPB_MOUSE    | Pyruvate dehydrogenase E1 component subunit beta, mitochondrial precursor            | 0.76           |         |      |
| 2            | 6.58  | Q9D0F9        | PGM1_MOUSE    | Phosphoglucomutase-1                                                                 | 1.03           |         |      |
| 2            | 9.20  | Q9D0S9        | HINT2_MOUSE   | Histidine triad nucleotide-binding protein 2                                         | 0.83           | 0.00    | 1.04 |
| 2            | 20.25 | Q9D0S9        | HINT2_MOUSE   | Histidine triad nucleotide-binding protein 2                                         | 0.92           | 0.50    | > 2  |
| 4            | 19.17 | Q9D172        | ES1_MOUSE     | ES1 protein homolog, mitochondrial precursor                                         | 1.03           | 0.71    | 1.20 |
| 2            | 8.46  | Q9D1G1        | RAB1B_MOUSE   | Ras-related protein Rab-1B                                                           | 1.00           |         |      |
| 2            | 28.86 | Q9D1G1        | RAB1B_MOUSE   | Ras-related protein Rab-1B                                                           | 0.85           |         |      |
| 2            | 3.73  | Q9D1M0        | SEC13_MOUSE   | SEC13-related protein                                                                | 1.84           | 0.03    | 1.50 |
| 2            | 3.73  | Q9D1M0        | SEC13_MOUSE   | SEC13-related protein                                                                | 1.96           | 0.08    | > 2  |
| 2.77         | 19.05 | Q9D2U9        | H2B3A_MOUSE   | Histone H2B type 3-A                                                                 | 0.41           | 0.00    | 1.31 |
| 3.3          | 19.05 | Q9D2U9        | H2B3A_MOUSE   | Histone H2B type 3-A                                                                 | 0.52           | 0.02    | 1.58 |
| 3.7          | 19.05 | Q9D2U9        | H2B3A_MOUSE   | Histone H2B type 3-A                                                                 | 0.67           | 0.02    | 1.32 |
| 2            | 26.19 | Q9D3D9        | ATPD_MOUSE    | ATP synthase delta chain, mitochondrial precursor                                    | 0.94           | 0.40    | 1.21 |
| 6.16         | 16.89 | Q9D6F9        | TBB4_MOUSE    | Tubulin beta-4 chain                                                                 | 1.19           | 0.30    | 1.46 |
| 2            | 8.60  | Q9D6J5        | NDUB8_MOUSE   | NADH dehydrogenase [ubiquinone] 1 beta subcomplex subunit 8, mitochondrial precursor | 0.92           |         |      |
| 4            | 16.39 | Q9D6R2        | IDH3A_MOUSE   | Isocitrate dehydrogenase [NAD] subunit alpha, mitochondrial precursor                | 0.90           | 0.53    | > 2  |
| 3.4          | 25.69 | Q9D7A6        | SRP19_MOUSE   | Signal recognition particle 19 kDa protein                                           | 1.79           |         |      |

**Table S2 Summary of the quantitatively undefined proteins in the iTRAQ study (continued)**

| Unused score | %Cov  | SWISS Prot ID | Accession No. | Protein Name                                                                     | (MKR117:WT114) |         | E.F. |
|--------------|-------|---------------|---------------|----------------------------------------------------------------------------------|----------------|---------|------|
|              |       |               |               |                                                                                  | Fold           | p value |      |
| 2            | 19.67 | Q9D7S7        | RL22L_MOUSE   | Ribosomal protein L22-like 1                                                     | 1.11           | 0.08    | 1.17 |
| 2            | 22.22 | Q9D892        | ITPA_MOUSE    | Inosine triphosphate pyrophosphatase                                             | 1.02           |         |      |
| 2            | 5.33  | Q9D8S3        | ARFG3_MOUSE   | ADP-ribosylation factor GTPase-activating protein 3                              | 1.38           |         |      |
| 2            | 7.53  | Q9D883        | U2AF1_MOUSE   | Splicing factor U2AF 35 kDa subunit                                              | 0.75           |         |      |
| 2            | 3.47  | Q9D8U8        | SNX5_MOUSE    | Sorting nexin-5                                                                  | 1.25           | 0.24    | > 2  |
| 2            | 6.78  | Q9DB05        | SNAA_MOUSE    | Alpha-soluble NSF attachment protein                                             | 1.11           | 0.34    | > 2  |
| 4.89         | 22.07 | Q9DB20        | ATPO_MOUSE    | ATP synthase O subunit, mitochondrial precursor                                  | 1.11           | 0.32    | 1.28 |
| 2            | 12.36 | Q9DB77        | UQCR2_MOUSE   | Ubiquinol-cytochrome-c reductase complex core protein 2, mitochondrial precursor | 0.84           | 0.45    | > 2  |
| 2            | 6.42  | Q9DBZ5        | IF3C_MOUSE    | Eukaryotic translation initiation factor 3 subunit 12                            | 1.15           |         |      |
| 2.06         | 11.93 | Q9DCS9        | NDUBA_MOUSE   | NADH dehydrogenase [ubiquinone] 1 beta subcomplex subunit 10                     | 1.02           | 0.84    | 1.58 |
| 2            | 4.95  | Q9EPK6        | SIL1_MOUSE    | Nucleotide exchange factor SIL1 precursor                                        | 1.56           |         |      |
| 2            | 12.20 | Q9EQK5        | MVP_MOUSE     | Major vault protein                                                              | 0.47           |         |      |
| 2            | 11.07 | Q9EQU5        | SET_MOUSE     | Protein SET                                                                      | 1.76           | 0.11    | > 2  |
|              | 14.67 | Q9ERD7        | TBB3_MOUSE    | Tubulin beta-3 chain                                                             |                |         |      |
| 2            | 9.88  | Q9ERR7        | SEP15_MOUSE   | 15 kDa selenoprotein precursor                                                   | 2.02           |         |      |
| 2            | 9.88  | Q9ERR7        | SEP15_MOUSE   | 15 kDa selenoprotein precursor                                                   | 1.38           |         |      |
| 2            | 6.52  | Q9ET22        | DPP2_MOUSE    | Dipeptidyl-peptidase 2 precursor                                                 | 0.29           |         |      |
| 2            | 5.73  | Q9JHU4        | DYHC_MOUSE    | Dynein heavy chain, cytosolic                                                    | 0.52           |         |      |
| 1.52         | 8.78  | Q9JJH1        | RNAS4_MOUSE   | Ribonuclease 4 precursor                                                         | 0.63           |         |      |
| 2            | 8.78  | Q9JJH1        | RNAS4_MOUSE   | Ribonuclease 4 precursor                                                         | 0.40           |         |      |
| 2            | 18.57 | Q9JJI8        | RL38_MOUSE    | 60S ribosomal protein L38                                                        | 1.39           | 0.20    | 1.55 |
|              | 27.62 | Q9JJZ2        | TBA8_MOUSE    | Tubulin alpha-8 chain                                                            |                |         |      |
| 2            | 3.24  | Q9JLJ2        | AL9A1_MOUSE   | 4-trimethylaminobutyraldehyde dehydrogenase                                      | 1.15           | 0.34    | > 2  |
| 2            | 6.18  | Q9JM76        | ARPC3_MOUSE   | Actin-related protein 2/3 complex subunit 3                                      | 0.74           |         |      |
| 2            | 7.32  | Q9QUM9        | PSA6_MOUSE    | Proteasome subunit alpha type 6                                                  | 1.18           |         |      |
| 2            | 4.58  | Q9QWR8        | NAGAB_MOUSE   | Alpha-N-acetylgalactosaminidase precursor                                        |                |         |      |
| 2            | 18.02 | Q9QYI6        | DNJB9_MOUSE   | DnaJ homolog subfamily B member 9                                                | 0.75           |         |      |
| 2            | 11.21 | Q9QUH0        | GLRX1_MOUSE   | Glutaredoxin-1                                                                   | 1.64           | 0.01    | 1.20 |
| 2            | 25.36 | Q9QZ08        | NAGK_MOUSE    | N-acetylglucosamine kinase                                                       | 0.68           | 0.08    | 1.80 |

**Table S2 Summary of the quantitatively undefined proteins in the iTRAQ study (continued)**

| Unused score | %Cov  | SWISS Prot ID | Accession No. | Protein Name                                                             | (MKR117:WT114) |         | E.F. |
|--------------|-------|---------------|---------------|--------------------------------------------------------------------------|----------------|---------|------|
|              |       |               |               |                                                                          | Fold           | p value |      |
| 2.02         | 15.76 | Q9R0P5        | DEST_MOUSE    | Dextrin                                                                  | 1.01           | 0.84    | 1.60 |
| 2.01         | 6.70  | Q9R0P6        | SPC18_MOUSE   | Microsomal signal peptidase 18 kDa subunit                               | 1.31           | 0.08    | 1.53 |
| 4            | 18.75 | Q9R0Q7        | TEBP_MOUSE    | Prostaglandin E synthase 3                                               | 1.00           | 0.92    | 1.20 |
| 2            | 8.46  | Q9R1P3        | PSB2_MOUSE    | Proteasome subunit beta type 2                                           | 1.54           | 0.30    | > 2  |
| 2            | 12.94 | Q9R1P3        | PSB2_MOUSE    | Proteasome subunit beta type 2                                           | 0.70           |         |      |
| 2            | 5.47  | Q9R1P3        | PSB2_MOUSE    | Proteasome subunit beta type 2                                           | 1.47           |         |      |
| 2            | 11.69 | Q9WU28        | PFD5_MOUSE    | Prefoldin subunit 5                                                      | 1.41           | 0.27    | > 2  |
| 2            | 5.41  | Q9WUM5        | SUCA_MOUSE    | Succinyl-CoA ligase [GDP-forming] subunit alpha, mitochondrial precursor | 1.05           |         |      |
| 2            | 4.57  | Q9WV54        | ASAH1_MOUSE   | Acid ceramidase precursor                                                | 0.65           |         |      |
| 2            | 5.62  | Q9WV55        | VAPA_MOUSE    | Vesicle-associated membrane protein-associated protein A                 | 1.60           | 0.01    | 1.12 |
| 4            | 12.26 | Q9WVA4        | TAGL2_MOUSE   | Transgelin-2                                                             | 1.25           | 0.24    | 1.58 |
| 2            | 6.37  | Q9WVK4        | EHD1_MOUSE    | EH domain-containing protein 1                                           | 1.09           | 0.69    | > 2  |
| 2            | 13.64 | Q9Z0S1        | BPNT1_MOUSE   | 3'(2'),5'-bisphosphate nucleotidase 1                                    | 0.82           |         |      |
| 2            | 3.03  | Q9Z1R2        | BAT3_MOUSE    | Large proline-rich protein BAT3                                          | 0.90           |         |      |
| 7.05         | 7.72  | Q9Z1Z0        | VDP_MOUSE     | General vesicular transport factor p115                                  | 1.11           | 0.22    | 1.21 |
| 2            | 3.83  | Q9Z204        | HNRPC_MOUSE   | Heterogeneous nuclear ribonucleoproteins C1/C2                           | 1.28           | 0.00    | 1.01 |
| 3.52         | 12.86 | Q9Z2U1        | PSA5_MOUSE    | Proteasome subunit alpha type 5                                          | 1.28           | 0.10    | 1.45 |

**Table S3 Primer sequences used in qPCR**

| <b>NCBI accession No.</b> | <b>Gene symbol</b> | <b>Forward primer (5'-3')</b> | <b>Reverse primer (5'-3')</b> |
|---------------------------|--------------------|-------------------------------|-------------------------------|
| NM_007450                 | Sla25a4(ANT1)      | TGCACATTATCGTGAGCTGGAT        | CGAACAGTGTCAAACGGATAGG        |
| NM_013494                 | CPE                | TTCGAGTACCACCGCTATCCA         | CCCCTGTGTAGATTCTGCTGATG       |
| NM_031197                 | Glut2              | CACATTCAAACCTGACTTTCTGTTACCT  | TGTACGCAAACCCGAAGTCT          |
| NM_022310                 | Grp78 (Bip)        | CCTCAGAGTGGAGTTGAAAATGC       | GACCCCAAGACATGTGAGCAA         |
| NM_172778                 | Maob               | CCCTACGACTTTGTGCTTGTCTT       | AGGTACAATGGCAAATAACTTGACAT    |
| NM_013628                 | PC1                | AGACAGCATTACACCATCTCTATCAG    | AGAACAATTCTCTGCATACCAAGGT     |
| NM_008792                 | PC2                | CCCAGAGACGACGACTCCAA          | CCAGGTGTGGGTGGTCATG           |
| NM_008797                 | Pcx                | TGTGCTCAGCGCCATGAA            | TTTCGGATAGTGCCCTCCAT          |
| NM_007952                 | PDI                | AATACTTTGATGGCAACTTGAAGAGA    | GACAGGCCCTTCGTTGGA            |
| NM_009215                 | Sst                | AGCCCAACCAGACAGAGAATGAT       | CTGCAGCTCCAGCCTCATCT          |
| NM_013757                 | Syt4               | GGAATTCCCCAGCCATTCTAAC        | GGTCAAGTTTAGGAAACAACCAAAG     |
| NM_011631                 | GRP94              | TCGGTTTTTATTCTGCCTTCCTT       | ATGTGCTGGGTATCATTGTTGTGT      |
| NM_009497                 | Vamp2              | GGTGGACATCATGAGGGTGAA         | TCATCCAGCTCCGACAACCTTCT       |
